# Supplementary material for: SARS-CoV-2 infection and vaccination elicit distinct pharyngeal mucosal B cell responses in children
Source: Research Square preprint supplement (doi:10.21203/rs.3.rs-7428491/v1), 2025-09-09
Supplement: Supplementary file 1 [file be3b03399958b5a7a1e08478.docx]

**Supplementary Figure 1. Gating strategy for SARS-CoV-2-specific B cells in PBMCs**


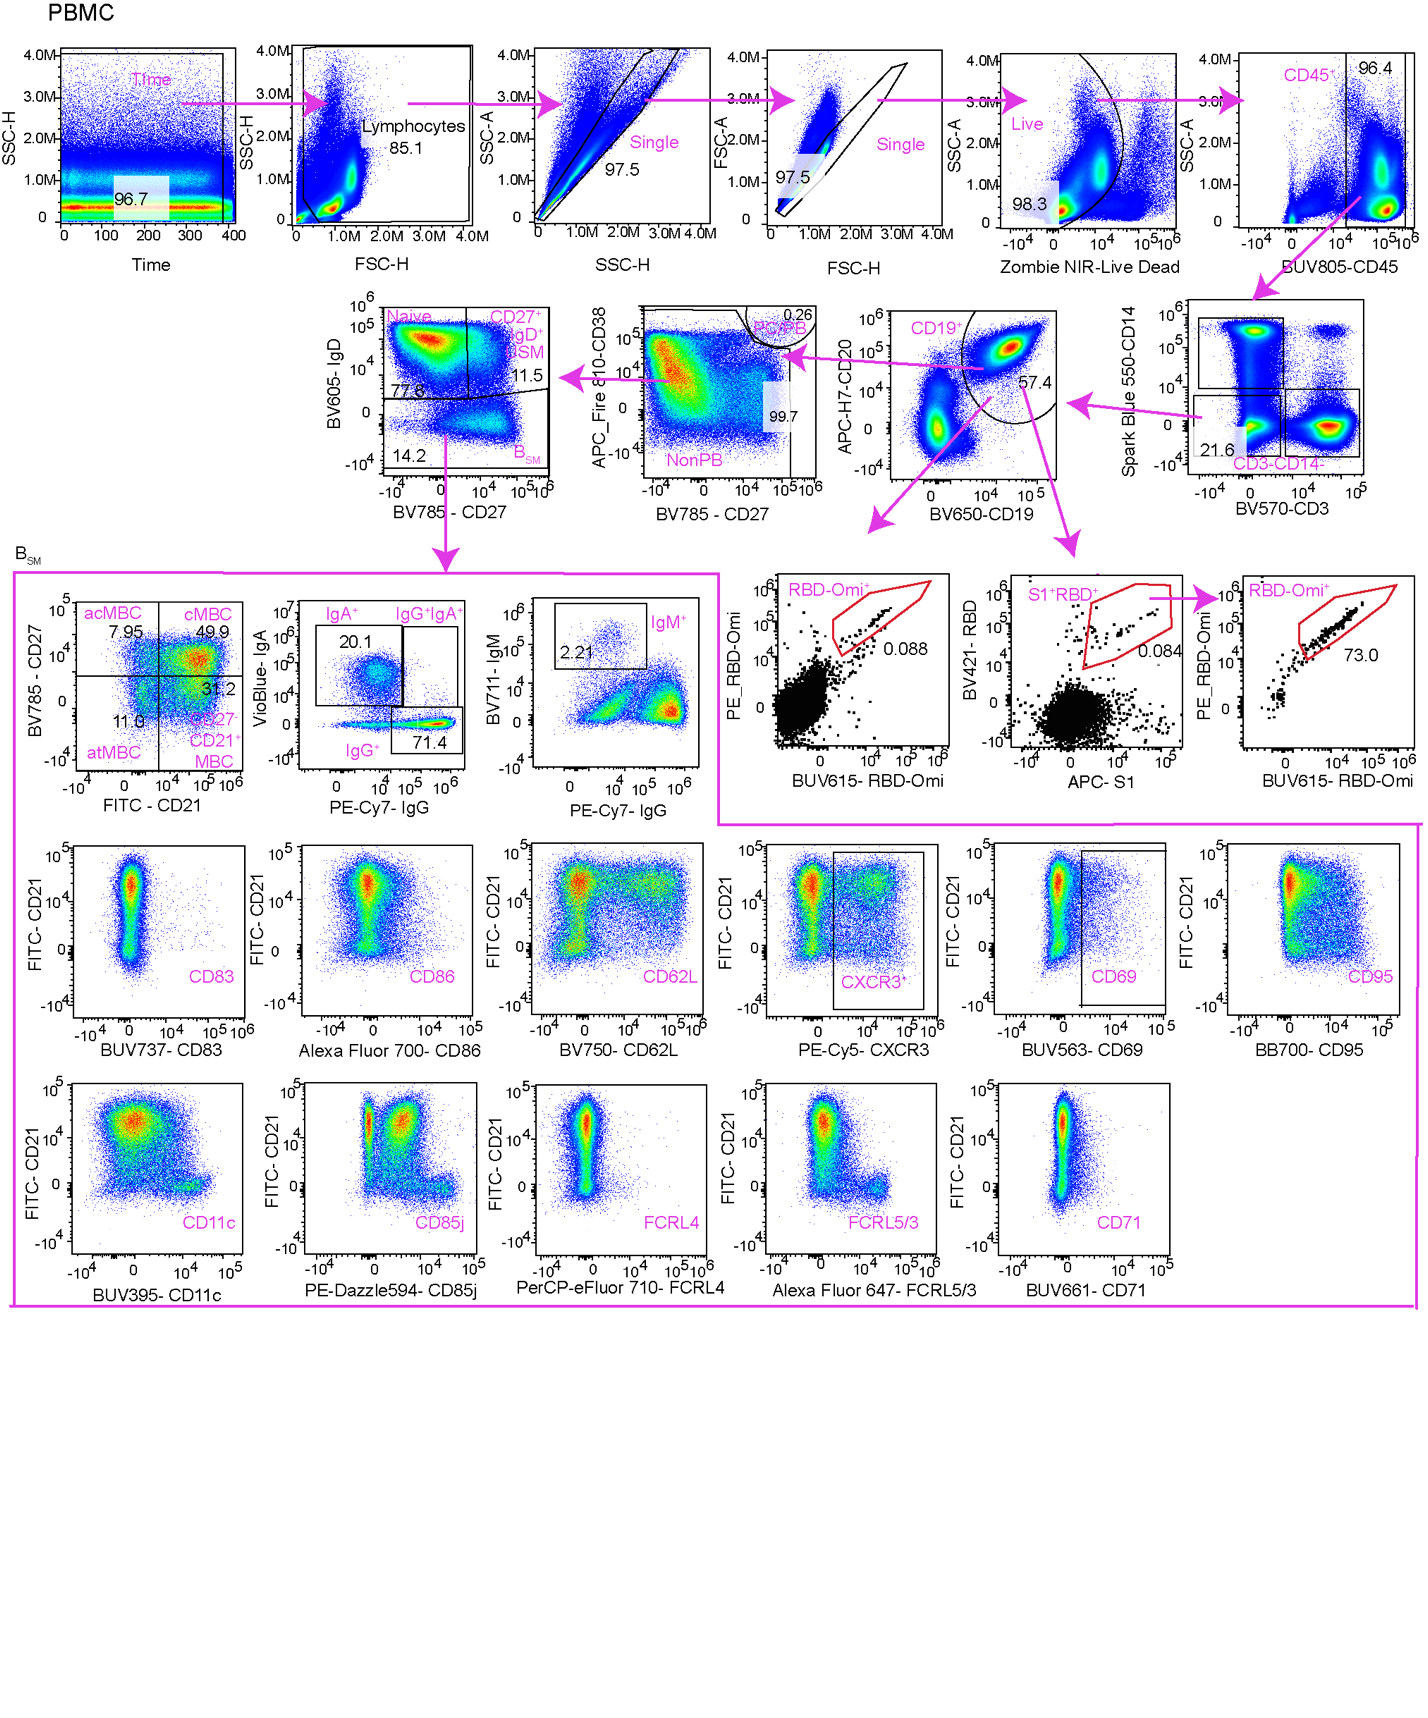


Gating strategy for identifying and characterizing SARS-CoV-2 antigen-specific B cells (S1+RBD+ or RBD-Omi+) in peripheral blood mononuclear cells (PBMC).

PB = plasmablast, USM = unswitched memory B cells, BSM = switched memory B cells, MBC = memory B cells

**Supplementary Figure 2. Gating strategy for SARS-CoV-2-specific B cells in adenoids and tonsils.**


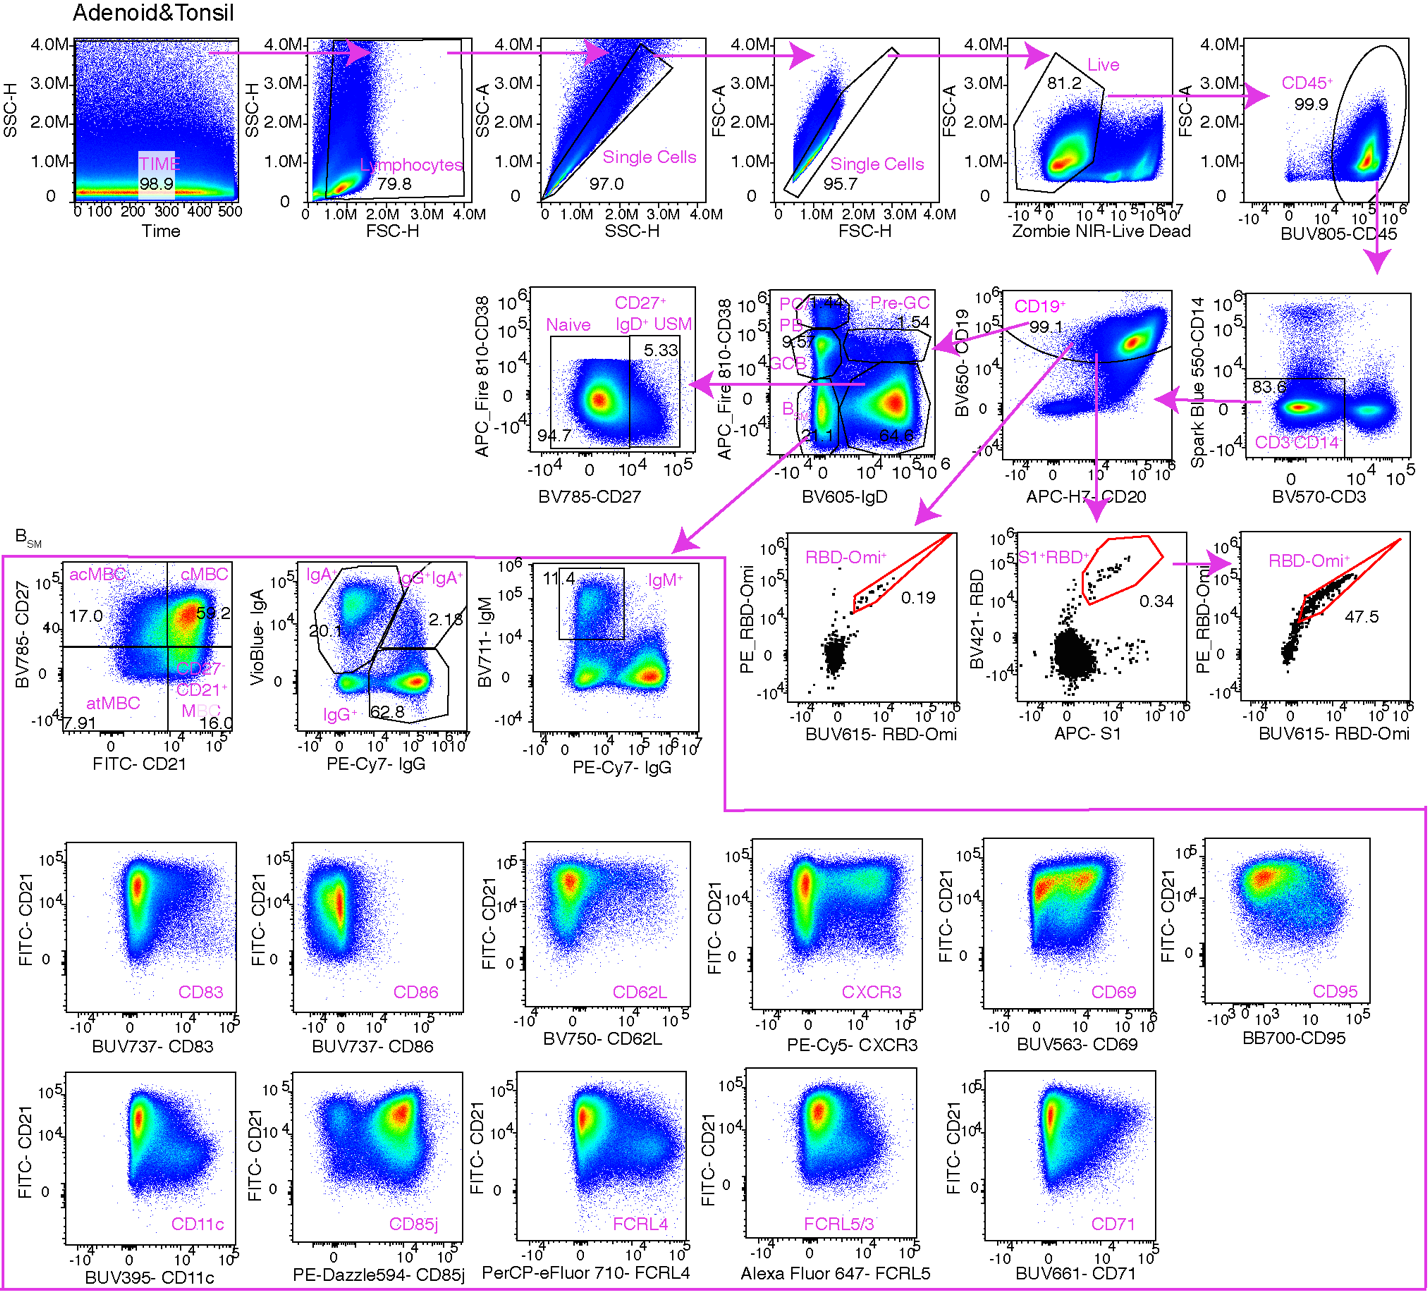


Gating strategy for identifying and characterizing SARS-CoV-2 antigen-specific (S1+RBD+ and RBD-Omi+) B cells in adenoid and tonsil.

PC = plasma cell; GCB = germinal center B cells; BSM = switched memory B cells; USM = unswitched memory B cells

**Supplementary Figure 3. Gating strategy for CD4+ T cells in adenoid and tonsil.**


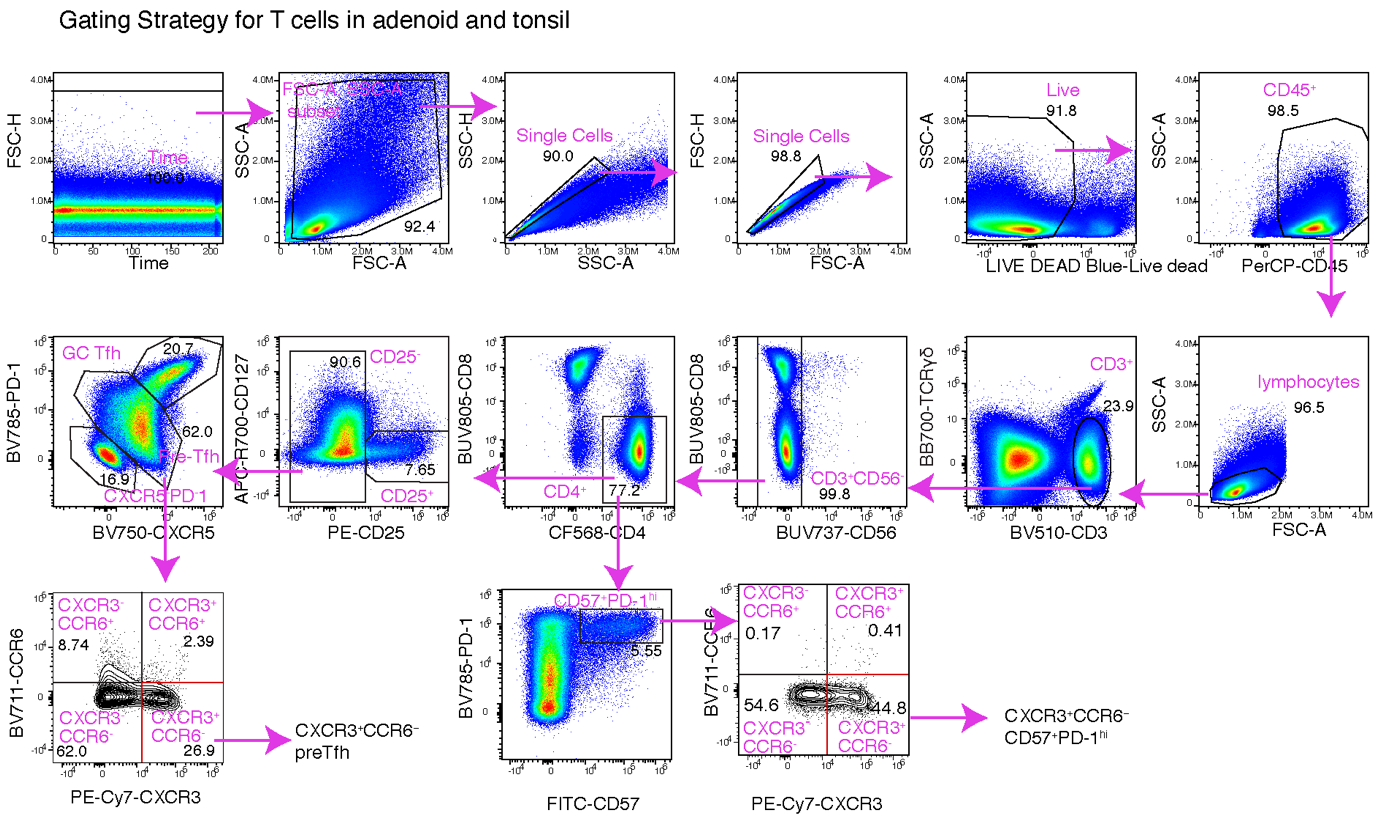


Gating strategy for CD4+ T cells in adenoid and tonsil.

GC-Tfh = germinal center T follicular helper cell; pre-Tfh = pre-T follicular helper cell

**Supplementary Figure 4. Gating strategy for innate immune cell populations**


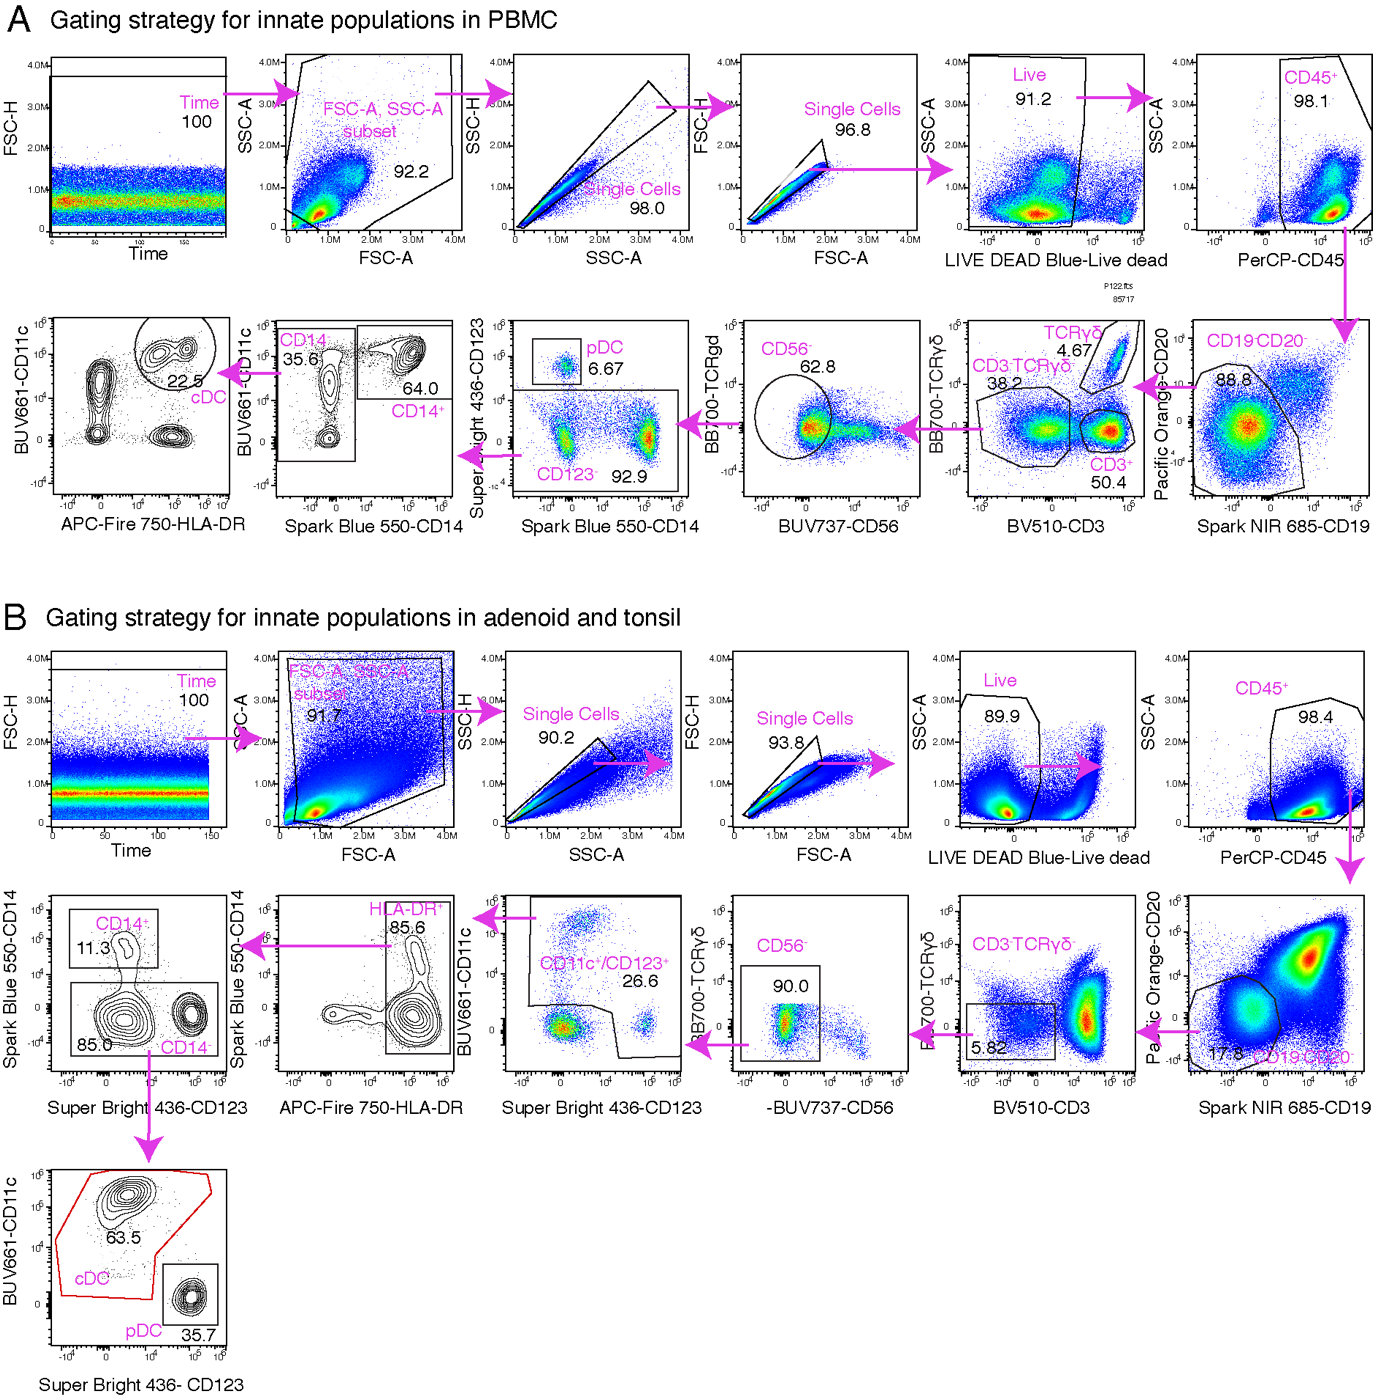


1. Gating strategy for innate populations in PBMC; B. Gating strategy for innate populations in adenoid and tonsil.

cDC = conventional dendritic cells; pDC = plasmacytoid dendritic cells

**Supplementary Figure 5. B cell sorting strategies**


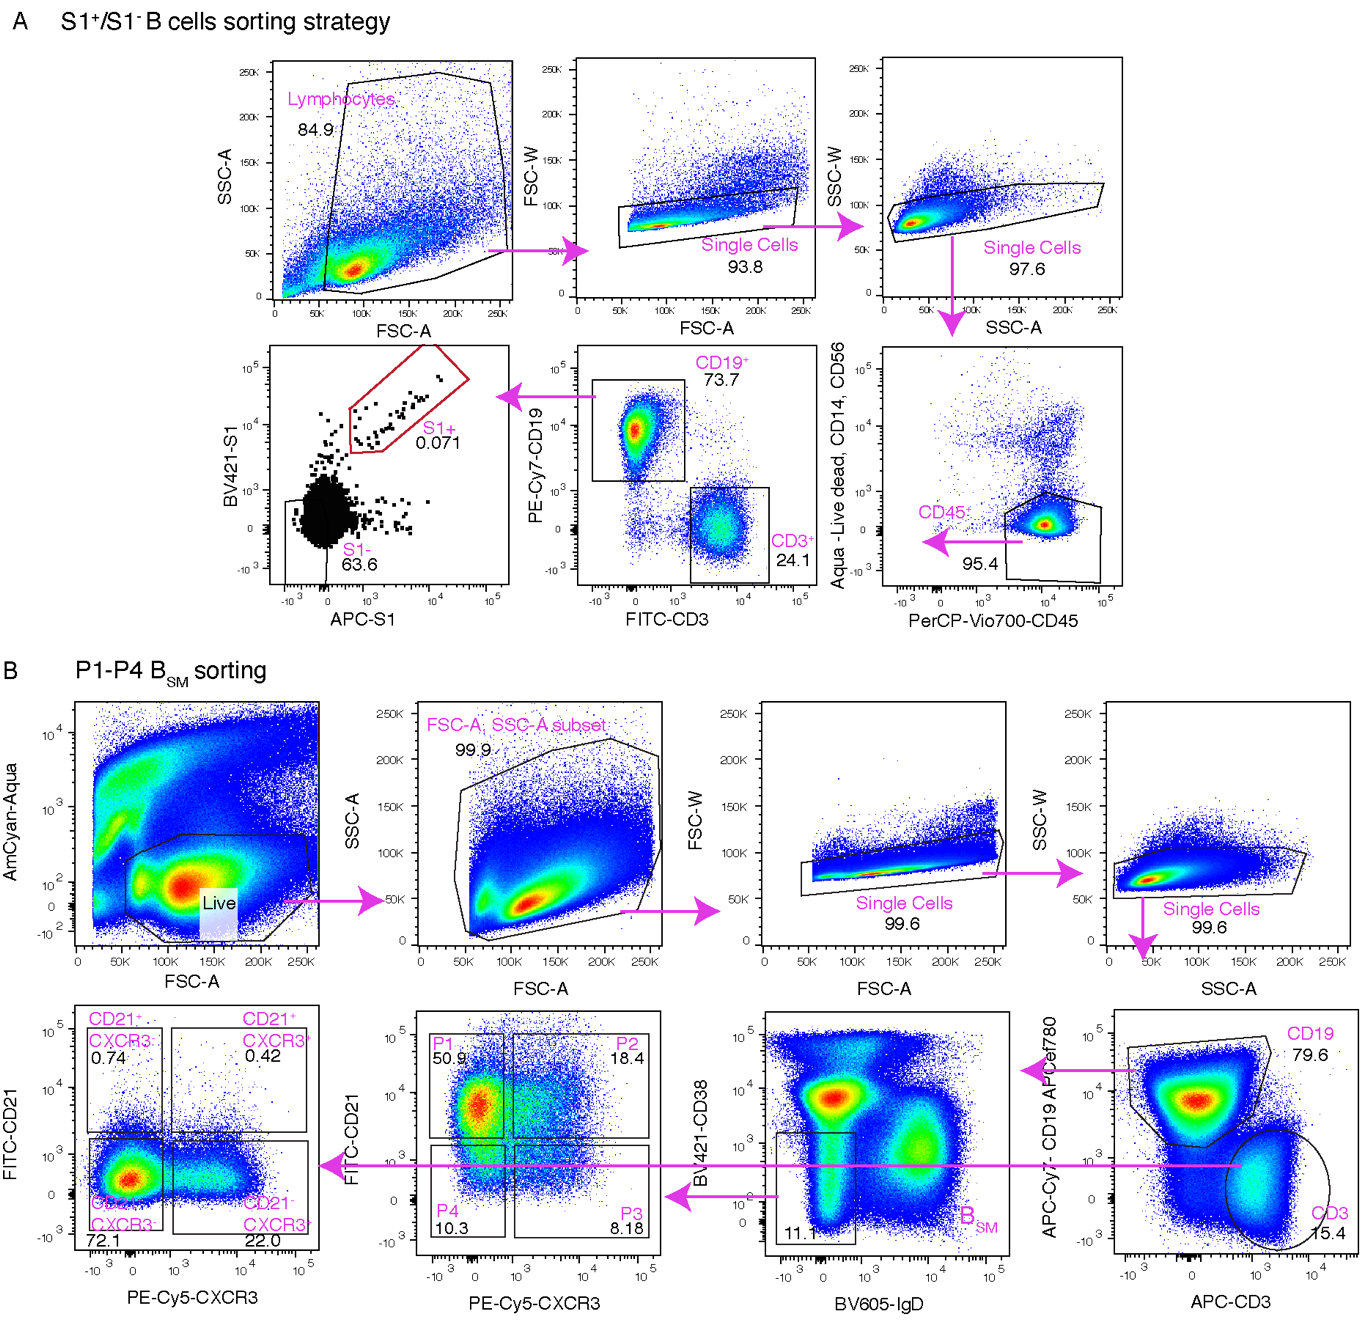


1. S1+ and S1- B cell sorting strategy for CITE-seq assay; B. P1-P4 BSM sorting strategy for ATAC-seq assay and *in vitro* plasma blast cell differentiation and proliferation assay. Gating of CD21 and CXCR3 among CD3+ T cells was used to position the gates for BSM. BSM = switched memory B cells

**Supplementary Figure 6. Gating strategy for B cell functional assays**


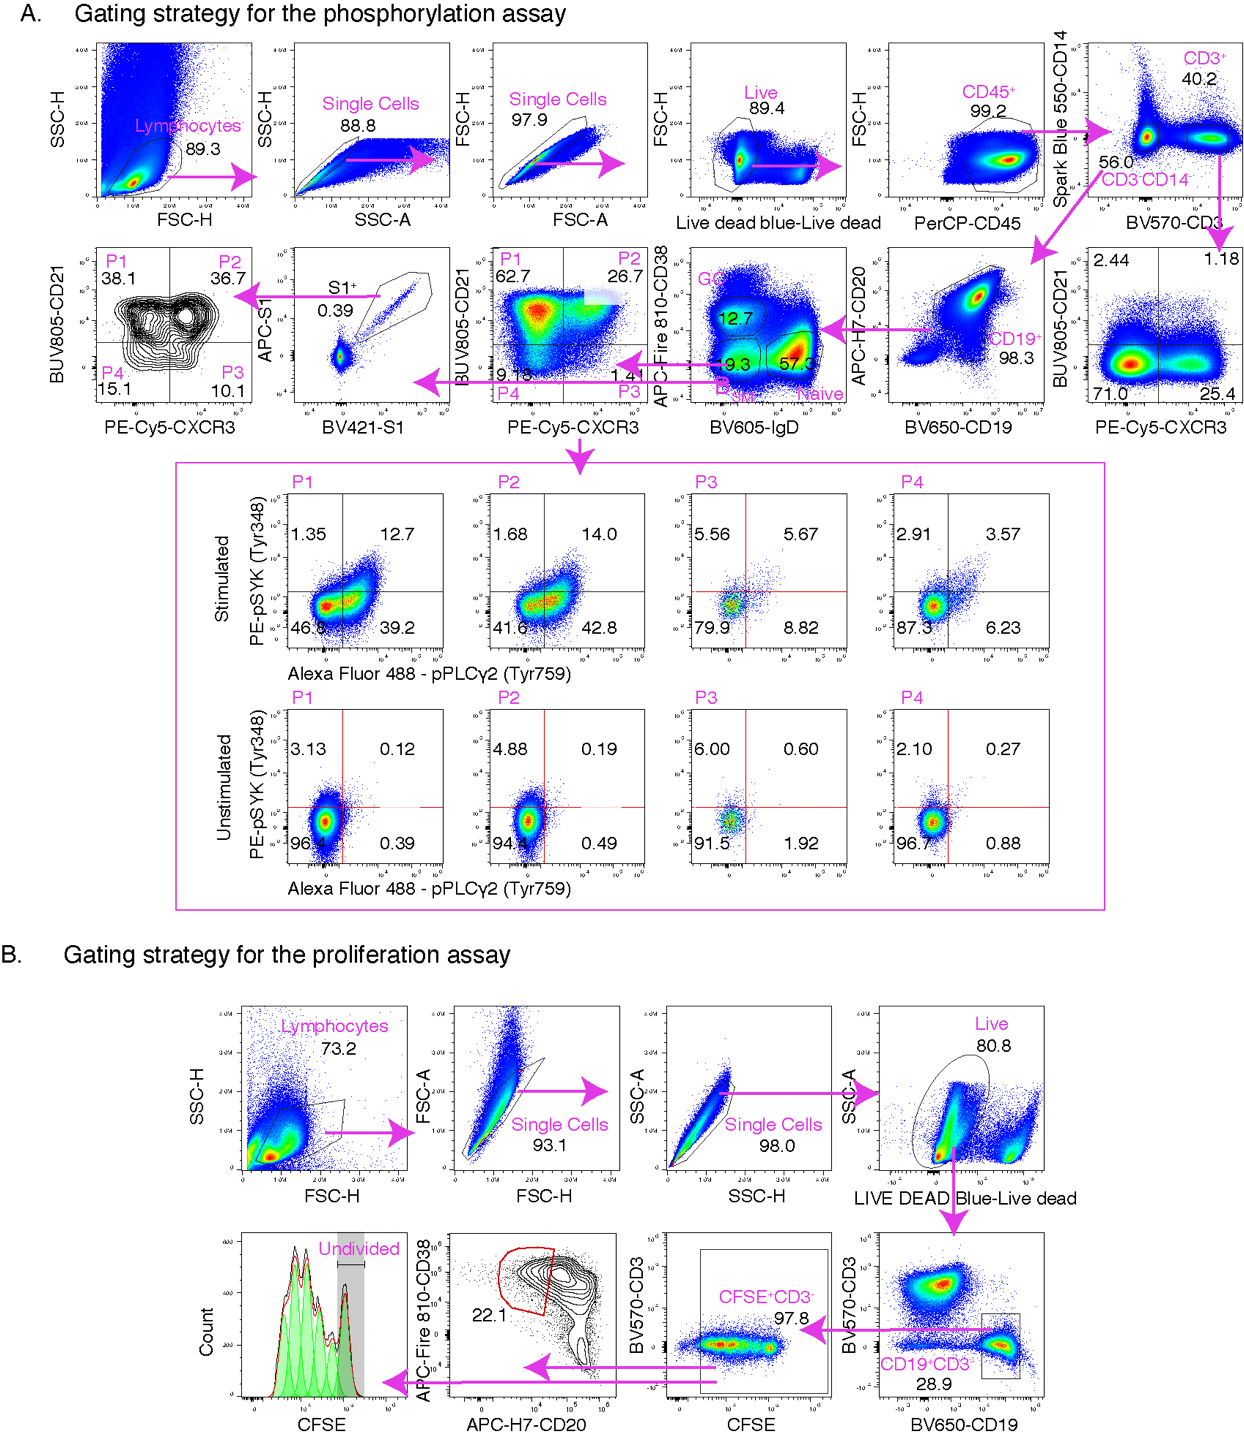


1. Gating strategy for B cell phosphorylation assay with and without stimulation with anti-human IgA/G/M; B. Gating strategy for *in vitro* plasma blast cell differentiation andproliferation assay.

CFSE = carboxyfluorescein succinimidyl ester; BSM = switched memory B cells; GC = germinal center
