# Supplementary material for: SARS-CoV-2 infection and vaccination elicit distinct pharyngeal mucosal B cell responses in children
Source: Research Square preprint supplement (doi:10.21203/rs.3.rs-7428491/v1), 2025-09-09
Supplement: Supplementary file 2 [file df5c0b5cea80c5d4f28149f5.xlsx]

## Sheet: 1. Group Characteristics
Supplemental Table 1: Characteristics of each group
	All Participants	CON	INF	VAC
Number of participants	46	12	24	10
Demographics
Mean Age (years) (±SD)	7.97±4.4	8.38±4.72	6.43±4.3	10.22±4.93
Sex
Male	27 (47.4%)	6 (50%)	13 (54.2%)	5 (50%)
Female	30 (52.6%)	6 (50%)	11 (45.8%)	5 (50%)
Race/Ethnicity
Black	8 (14.0%)	2 (16.7%)	3 (12.5%)	1 (10%)
Hispanic	30 (52.6%)	5 (41.7%)	18 (75.0%)	3 (30%)
Whilte	11 (19.3%)	3 (25%)	0	4 (40%)
Other/Mixed/Unknown	8 (14.0%)	2 (16.7%)	3 (12.5%)	2 (20%)
Clinical Characteristics
Primary Diagnosis
Obstructive sleep disordered breathing	33 (57.9%)	6 (50%)	14 (58.3%)	5 (50%)
Mild OSA, AHI >1 and < 5	9 (15.8%)	1 (8.33%)	6 (25%)	1 (10%)
Moderate OSA, AHI 5 to 10	4 (7.0%)	2 (16.7%)	1 (4.2%)	1 (10%)
Severe OSA, AHI >10	2 (3.5%)	0	2 (8.3%)	0
Eustachian tube dysfunction	1 (1.8%)	0	1 (4.2%)	0
Recurrent tonsillitis	2 (3.5%)	1 (8.33%)	0	1 (10%)
Chronic tonsillitis/tonsil stones	6 (10.5%)	2 (16.7%)	0	2 (20%)
Medications (within 2 weeks prior to surgery)
Inhaled or nasal corticosteroid	12 (21.1%)	2 (16.7%)	4 (16.7%)	3 (30%)
Loratadine (Claritin)	4 (7.0%)	2 (16.7%)	1 (4.2)	1 (10%0
Montelukast (Singulair)	1 (1.8%)	1 (8.3%)	0	0
Cetirizine (Zyrtec)	4 (7.0%)	1 (8.3%)	0	2 (20%)
Prior COVID-19 identified by serology/flow cytometry
Negative	22. (38.6%)	12 (100%)	0	10 (100%)
Positive	35 (61.4%)	0	24 (100%)	0
Doses of vaccine
One dose	1 (1.8%)	0	0	0
Two doses	15 (26.3%)	0	0	8 (80%)
Three doses	5 (8.8%)	0	0	2 (20%)
AHI = apnea hypopnea index

## Sheet: 2. Participant Characteristics
Supplemental Table 2. Participant characteristics and summary of samples used in immune profiling																						Samples used in B cell profiling panel			Samples used in broad immune profiling panel			Samples used in each assay
Participant ID	PBMC ID	Adenoid ID	Tonsil ID	Group	Tonsil Condition	Diagnosis code for linear model	Age (years)	Sex	Race	Surgery Date	COVID-19 Vaccination	Vaccine type	Dates of Vaccination	First Vaccine Dose Date	Days from 1st vaccination to Surgery	Last Vaccine Dose	Days from last vaccine dose to surgery	COVID-19 confirmed by PCR or Ag test	Date of infection	Days from infection to surgery	Medications	29c flow panel - PBMC	29c flow panel - Adenoid	29c flow panel - Tonsil	37c flow panel - PBMC	37c flow panel - Adenoid	37c flow panel - Tonsil	Transcription factor staining	BCR stimulation Assay	Plasmablast differentiation assay	ATACseq assay	Imaging assay (IF+Xenium)
CNMC 007	P007	A007	T007	CON	SDB	Other	3	Male	Hispanic	2020-10-01												PBMC	Adenoid	Tonsil	PBMC	Adenoid	Tonsil
CNMC 010	P010	A010	T010	CON	SDB	Other	4.5	Female	Hispanic	2020-10-02											Loratadine	PBMC	Adenoid	Tonsil	PBMC	Adenoid	Tonsil
CNMC 017	P017	A017	T017	CON	Mild OSA	Other	10.5	Female	Hispanic	2020-10-19												PBMC	Adenoid	Tonsil	PBMC	Adenoid	Tonsil		Tonsil
CNMC 018	P018	A018	T018	CON	SDB	Other	4.5	Female	White	2020-10-20												PBMC	Adenoid	Tonsil	PBMC	Adenoid	Tonsil
CNMC 019	P019	A019	T019	CON	Moderate OSA	Other	4.2	Male	Other	2020-10-20											Zyrtec	PBMC	Adenoid	Tonsil	PBMC	Adenoid	Tonsil
CNMC 028	P028	A028	T028	CON	SDB	Other	4.3	Female	Hispanic	2020-11-06											Albuterol, Singulair	PBMC	Adenoid	Tonsil		Adenoid	Tonsil
CNMC 042	P042	A042	T042	CON	Moderate OSA	Other	7.6	Female	Black	2020-11-17												PBMC	Adenoid	Tonsil	PBMC	Adenoid	Tonsil
CNMC 061	P061	NA	T061	CON	SDB	Other	9.3	Male	White	2020-12-03											Inhaled steroid			Tonsil	PBMC		Tonsil
CNMC 063	P063	A063	T063	CON	SDB	Other	6.9	Male	Black	2020-12-04														Tonsil	PBMC	Adenoid	Tonsil
CNMC 067	P067	A067	T067	CON	Recurrent tonsillits	ReT	16.4	Male	White	2020-12-04											Loratadine, Inhaled steroid, Albuterol, diphenhydramine	PBMC	Adenoid	Tonsil	PBMC	Adenoid	Tonsil
CNMC 075	P075	A075	T075	CON	Chronic tonsillitis	ReT	15.3	Female	Hispanic	2020-12-10												PBMC	Adenoid	Tonsil	PBMC	Adenoid	Tonsil
CNMC 105	P105	NA	T105	CON	Chronic tonsillitis, recurrent tonsillitis	ReT	14	Male	Other	2021-05-18												PBMC		Tonsil	PBMC		Tonsil
CNMC 001	P001	A001	T001	INF	SDB	Other	2.6	Female	Black	2020-09-25								Yes				PBMC	Adenoid	Tonsil		Adenoid	Tonsil
CNMC 005	NA	NA	T005	INF	SDB	Other	7.5	Female	Hispanic	2020-09-28								Yes						Tonsil			Tonsil					Adenoid, Tonsil
CNMC 008	P008	NA	T008	INF	Mild OSA	Other	3.4	Male	Black	2020-10-02								Yes				PBMC		Tonsil	PBMC		Tonsil
CNMC 011	P011	NA	T011	INF	Mild OSA	Other	8	Male	HIspanic	2020-10-02								Yes	2020-05-13	142		PBMC		Tonsil	PBMC		Tonsil
CNMC 016	NA	A016	T016	INF	SDB	Other	8.9	Female	Hispanic	2020-10-18								Yes					Adenoid	Tonsil		Adenoid	Tonsil
CNMC 022	NA	A022	T022	INF	Mild OSA	Other	4.1	Male	Hispanic	2020-10-26								Yes	2020-07-10	108			Adenoid	Tonsil		Adenoid	Tonsil
CNMC 029	NA	NA	T029	INF	SDB	Other	3.1	Male	Black	2020-11-06								Yes						Tonsil			Tonsil
CNMC 032	P032	NA	T032	INF	Severe OSA	Other	3.6	Female	Hispanic	2020-11-06								Yes	2020-10-11	26		PBMC		Tonsil	PBMC		Tonsil
CNMC 041	NA	A041	T041	INF	Severe OSA	Other	6	Female	Hispanic	11/178/2020								Yes					Adenoid	Tonsil		Adenoid	Tonsil
CNMC 046	NA	A046	T046	INF	SDB	Other	7.2	Male	Other	2020-11-19								Yes					Adenoid	Tonsil		Adenoid	Tonsil
CNMC 050	P050	A050	T050	INF	SDB	Other	2.9	Female	Hispanic	2020-11-19								Yes	2020-10-20	31	Inahled steroid	PBMC	Adenoid	Tonsil		Adenoid	Tonsil
CNMC 069	NA	A069	T069	INF	SDB	Other	3.4	Female	Hispanic	2020-12-08								Yes	2020-05-21	201	Inahled steroid		Adenoid	Tonsil		Adenoid	Tonsil
CNMC 070	P070	NA	T070	INF	Mild OSA	Other	16.4	Male	Hispanic	2020-12-08								Yes	2020-09-28	98		PBMC		Tonsil	PBMC		Tonsil
CNMC 071	P071	NA	T071	INF	SDB	Other	6.2	Female	Hispanic	2020-12-10								Yes	2020-09-29	71		PBMC		Tonsil	PBMC		Tonsil
CNMC 087	NA	A087	T087	INF	SDB	Other	6	Male	Hispanic	2021-01-05								Yes			Loratadine		Adenoid	Tonsil		Adenoid	Tonsil
CNMC 089	NA	A089	T089	INF	SDB	Other	12.1	Female	Hispanic	2021-01-07								Yes					Adenoid	Tonsil		Adenoid	Tonsil
CNMC 091	P091	A091	T091	INF	Moderate OSA	Other	9.2	Male	Hispanic	2021-01-11								Yes				PBMC	Adenoid	Tonsil	PBMC	Adenoid	Tonsil
CNMC 100	P100	NA	T100	INF	Mild OSA	Other	4.7	Female	Other	2021-01-25								Yes	2020-12-31	25	Inahled steroid	PBMC		Tonsil	PBMC		Tonsil
CNMC 101	P101	A101	T101	INF	SDB	Other	4.6	Male	Hispanic	1/256/2021								Yes				PBMC	Adenoid	Tonsil		Adenoid	Tonsil
CNMC 102	P102	NA	T102	INF	SDB	Other	5.1	Male	Hispanic	2021-02-10								Yes	2021-01-06	35		PBMC		Tonsil	PBMC		Tonsil
CNMC 103	P103	A103	T103	INF	Mild OSA	Other	8.1	Male	Hispanic	5/123/2021								Yes	2020-06-22	303		PBMC	Adenoid	Tonsil	PBMC	Adenoid	Tonsil
CNMC 104	P104	NA	T104	INF	SDB	Other	6.8	Male	Hispanic	2021-05-18								Yes			Inahled steroid	PBMC		Tonsil	PBMC		Tonsil
CNMC 108	P108	A108	NA	INF	ETD	Other	4.2	Female	Other	2021-06-21								Yes	2021-03-29	84		PBMC	Adenoid		PBMC	Adenoid
CNMC 109	P109	A109	NA	INF	SDB	Other	5.1	Male	Hispanic	2021-06-21								Yes				PBMC	Adenoid		PBMC	Adenoid
CNMC 111	P111	A111	T111	VAC	SDB	Other	10.2	Male	White	2021-12-14	Yes	Pfizer	11/6/21, 11/28/21	2021-11-06	38	2021-11-28	16				Zyrtec	PBMC	Adenoid	Tonsil	PBMC	Adenoid	Tonsil
CNMC 113	P113	NA	T113	VAC	Chronic tonsillitis, recurrent tonsillitis	ReT	13.1	Female	White	2022-01-07	Yes	Pfizer	5/14/21, 6/4/21	2021-05-01	251	2021-06-04	217				Inhaled steroid, Loratadine	PBMC		Tonsil	PBMC		Tonsil
CNMC 115	P115	A115	T115	VAC	Recurrent tonsillits	ReT	19.3	Female	Black	2022-01-07	Yes, boosted	Moderna	2/12/2021, 3/12/2021, 12/7/21	2021-02-12	329	2021-12-07	31					PBMC	Adenoid	Tonsil	PBMC	Adenoid	Tonsil
CNMC 116	P116	A116	NA	VAC	SDB	Other	5.6	Male	Asian	2022-01-25	Yes	Pfizer	12/19/21, 12/30/21	2021-12-19	37	2021-12-30	26					PBMC	Adenoid		PBMC	Adenoid
CNMC 122	P122	A122	T122	VAC	Chronic tonsillitis/tonsil stones	ReT	17	Female	White	2022-02-09	Yes, boosted	Pfizer	4/15/21, 5/6/21, 12/16/21	2021-04-15	300	2021-12-16	55					PBMC	Adenoid	Tonsil	PBMC	Adenoid
CNMC 124*	P124	A124	NA	VAC	SDB	Other	5.7	Male	Hispanic	2022-03-10	Yes	Pfizer	1/21/2022, 2/11/2022	2022-01-21	48	2022-02-11	27				Inahled steroid	PBMC	Adenoid		PBMC	Adenoid
CNMC 125*	P125	A125	NA	VAC	SDB	Other	5.7	Male	Hispanic	2022-03-10	Yes	Pfizer	1/21/2022, 2/11/2022	2022-01-21	48	2022-02-11	27				Inahled steroid	PBMC	Adenoid		PBMC	Adenoid
CNMC 126	P126	A126	T126	VAC	Moderate OSA	Other	6.3	Female	Hispanic	2022-03-28	Yes	Pfizer	11/18/2021, 12/09/2021	2021-11-18	130	2021-12-09	109				Zyrtec	PBMC	Adenoid	Tonsil	PBMC	Adenoid	Tonsil
CNMC 128	P128	A128	T128	VAC	Chronic tonsillitis (secondary diagnosis SDB)	ReT	11	Female	Mixed	2022-04-14	Yes	Pfizer	12/28/2021, 1/19/2022	2021-12-28	107	2022-01-19	85					PBMC	Adenoid	Tonsil	PBMC	Adenoid	Tonsil
CNMC 133	P133	A133	T133	VAC	Mild OSA	Other	8.3	Male	White	2022-08-10	Yes	Pfizer	12/1/21, 12/21/21	2021-12-01	252	2021-12-21	232					PBMC	Adenoid	Tonsil	PBMC	Adenoid	Tonsil					Adenoid, Tonsil
CNMC 114	P114	A114	T114	INF recruited in 2022/2023	Recurrent tonsillits	ReT	16	Male	white	2022-01-07									2021-11-01	67		PBMC	Adenoid	Tonsil	PBMC	Adenoid	Tonsil		Tonsil
CNMC 118	P118	NA	NA	INF recruited in 2022/2023	SDB, ETD	Other	2.3	Male	Mixed	2022-02-08								Yes	2022-01-06	33		PBMC			PBMC
CNMC 129	P129	A129	T129	INF recruited in 2022/2023	Severe OSA	Other	7	Female	Hispanic/latino	2022-04-14												PBMC	Adenoid	Tonsil	PBMC	Adenoid	Tonsil
CNMC 132	P132	A132	T132	INF recruited in 2022/2023	SDB	Other	4	Female	Hispanic/latino	2022-08-10												PBMC	Adenoid	Tonsil	PBMC	Adenoid	Tonsil		Tonsil
CNMC 136	P136	A136	T136	INF recruited in 2022/2023	SDB	Other	4	Female	White	2022-09-01									2021-12-27	248		PBMC	Adenoid	Tonsil	PBMC	Adenoid	Tonsil
CNMC 137	P137	A137	T137	INF recruited in 2022/2023	SDB	Other	3	Female	black/aa	2022-09-02									2020-03-01	915		PBMC	Adenoid	Tonsil	PBMC	Adenoid	Tonsil
CNMC 138	P138	A138	T138	INF recruited in 2022/2023	Severe OSA	Other	7	Male	Hispanic/latino	2022-09-08									2021-10-02	341		PBMC	Adenoid	Tonsil	PBMC	Adenoid	Tonsil	Tonsil	Tonsil
CNMC 139	P139	A139	T139	INF recruited in 2022/2023	SDB	Other	4	Female	White	2022-09-09									6/1/21?			PBMC	Adenoid	Tonsil	PBMC	Adenoid	Tonsil
CNMC 140	P140	A140	T140	INF recruited in 2022/2023	SDB	Other	7	Male	White	2022-09-09									2021-06-01	465		PBMC	Adenoid	Tonsil	PBMC	Adenoid	Tonsil
CNMC 141	P141	A141	T141	INF recruited in 2022/2023	Tonsil stone/chronic tonsillitis	ReT	5	Male	Hispanic	2023-09-13									2022-08-10	399				Tonsil							Tonsil
CNMC 142	P142	A142	T142	INF recruited in 2022/2023	Adenotonsilar hypertrophy NOS/sleep disordered breathing	Other	4	Female	White	2023-09-13									2021-01-01	985				Tonsil						Tonsil	Tonsil
CNMC 143	P143	A143	T143	INF recruited in 2022/2023	Adenotonsilar hypertrophy NOS/sleep disordered breathing	Other	10	Male	Asian	2023-09-13									2022-06-01	469				Tonsil							Tonsil
CNMC 112	P112	NA	T112	Hybird	Chornic tonsillitis/ tonsil stones	ReT	16.9	Female	White	2022-01-06	Yes, boosted	Pfizer	3/6/2021, 3/27/2021, 12/18/2021	2021-03-06	306	2021-12-18	19				Inhaled steroid, isotretinoin, thiamine	PBMC		Tonsil	PBMC		Tonsil		Tonsil
CNMC 117	P117	A117	T117	Hybird	SDB	Other	11.2	Female	Hispanic	2022-02-08	Yes	Pfizer	11/24/2021, 12/15/2021	2021-11-24	76	2021-12-15	55					PBMC	Adenoid	Tonsil	PBMC	Adenoid	Tonsil		Tonsil
CNMC 119	P119	A119	T119	Hybird	SDB	Other	14.2	Male	White	2022-02-08	Yes	Pfizer	11/15/2021, 12/6/2021	2021-11-15	85	2021-12-06	64				Inahled steroid	PBMC	Adenoid	Tonsil	PBMC	Adenoid	Tonsil		Tonsil
CNMC 120	P120	A120	T120	Hybird	SDB	Other	6.8	Male	Black	2022-02-09	Yes	Pfizer	11/10/2021, 12/7/2021	2021-11-10	91	2021-12-07	64				Zyrtec	PBMC	Adenoid	Tonsil	PBMC	Adenoid	Tonsil
CNMC 121	P121	A121	T121	Hybird	SDB	Other	7.1	Female	Black	2022-02-09	Yes, first dose	Pfizer	2022-01-08	2022-01-08	32	2022-01-08	32					PBMC	Adenoid	Tonsil	PBMC	Adenoid	Tonsil			Tonsil
CNMC 123	P123	A123	T123	Hybird	SDB	Other	5.3	Female	White	2022-03-03	Yes, first dose	Pfizer	2022-02-11	2022-02-11	20	2022-02-11	20					PBMC	Adenoid	Tonsil	PBMC	Adenoid	Tonsil
CNMC 127	P127	A127	T127	Hybird	Mild OSA	Other	15.8	Female	Hispanic	2022-03-28	Yes	Pfizer	12/28/21, 1/19/22	2021-12-28	90	2022-01-19	68	Yes	2020-06-14	652		PBMC	Adenoid	Tonsil	PBMC	Adenoid	Tonsil	Tonsil	Tonsil	Tonsil
CNMC 130	P130	A130	T130	Hybird	SDB	Other	11.3	Female	Hispanic	2022-04-14	Yes	Pfizer	12/1/2021, 12/22/2021	2021-12-01	134	2021-12-22	113	Yes	2021-12-17	118		PBMC	Adenoid	Tonsil	PBMC	Adenoid	Tonsil	Tonsil	Tonsil
CNMC 131	P131	A131	T131	Hybird	SDB	Other	4.8	Female	Unknown	2022-08-10	Yes	Pfizer	6/25/22, 7/11/22	2022-06-25	46	2022-07-11	30	Yes	2022-04-13	119		PBMC	Adenoid	Tonsil	PBMC	Adenoid	Tonsil
CNMC 134	P134	A134	T134	Hybird	SDB	Other	7.2	Male	White	2022-08-29	Yes	Pfizer	11/13/21, 12/4/21	2021-11-13	289	2021-12-04	268	Yes	2022-08-02	27	Inhaled steroid	PBMC	Adenoid	Tonsil	PBMC	Adenoid	Tonsil		Tonsil
CNMC 135	P135	A135	T135	Hybird	SDB	Other	2	Female	Hispanic	2022-09-08	Yes, first dose	Moderna	2022-08-22	2022-08-22	17	2022-08-22	17					PBMC	Adenoid	Tonsil	PBMC	Adenoid	Tonsil
SDB = sleep disordered breathing (clinical diagnosis, no polysomnography)
OSA = obstructive sleep disordered breathing, diagnosed by polysomnography
Mild OSA, apnea hypopnea index (AHI) >1 and < 5
Moderate OSA, AHI 5 to 10
Severe OSA, AHI >10
* CNMC 124 and CNMC 125 are fraternal twins.
PBMC samples used in transcription factor were derived from three healthy children.

## Sheet: 3. Serology and S1RBD B cells
Supplemental Table 3. Serologic test summary and percentages of S1+RBD+ B cells
Participant ID	PBMC ID	Adenoid ID	Tonsil ID	Group	Spike IgG ELISA	NC (nucleocapsid) IgG ELISA	ORF8 IgG ELISA	Neutralizing antibodies to WA-1 (PsVNA50)	Neutralizing antibodies to B.1.1.159 Omicron (BA.1) (PsVNA50)	PBMC: %S1+RBD+ among CD19+ B cells	Adenoid: %S1+RBD+ among CD19+ B cells	Tonsil: %S1+RBD+ among CD19+ B cells
CNMC 007	P007	A007	T007	CON			Negative	10	10	0.00119	0.00117	0.0023
CNMC 010	P010	A010	T010	CON			Negative	10	10	0.00148	0.00396	0.000869
CNMC 017	P017	A017	T017	CON				10	10	0	0.000697	0.00131
CNMC 018	P018	A018	T018	CON				10	10	0.00176	0.000766	0.00082
CNMC 019	P019	A019	T019	CON				10	10	0	0.000766	0.000563
CNMC 028	P028	A028	T028	CON				10	10	0.0018	0.002	0.000656
CNMC 042	P042	A042	T042	CON				10	10	0.00219	0.000942	0.000709
CNMC 063	P063	A063	T063	CON				10	10	0.00275	0.000426	0.000982
CNMC 067	P067	A067	T067	CON				10	10	0.00062	0.00115	0.00027
CNMC 075	P075	A075	T075	CON				10	10	0.00334	0.000296	0.00115
CNMC 061	P061	NA	T061	CON				10	10	0.000595	NA	0.000357
CNMC 105	P105	NA	T105	CON				10	10	0.000967	NA	0.000333
CNMC 001	P001	A001	T001	INF	Positive		Positive	144.6	10	0.0065	0.015	0.00706
CNMC 016	NA	A016	T016	INF	Positive			1781.7	45.7	NA	0.034	0.016
CNMC 022	NA	A022	T022	INF	NA			NA	NA	NA	0.038	0.027
CNMC 041	NA	A041	T041	INF	Positive			460.1	83.9	NA	0.055	0.041
CNMC 046	NA	A046	T046	INF	Positive			588.1	31.4	NA	0.048	0.017
CNMC 050	P050	A050	T050	INF	Positive			736.9	10	0.017	0.021	0.011
CNMC 069	NA	A069	T069	INF	Positive			383	10	NA	0.046	0.019
CNMC 087	NA	A087	T087	INF	Positive			775.8	32.7	NA	0.048	0.033
CNMC 089	NA	A089	T089	INF	Positive		Positive	401.4	10	NA	0.049	0.044
CNMC 091	P091	A091	T091	INF	indeterminate		Positive	72.1	10	0.00369	0.00425	0.00321
CNMC 101	P101	A101	T101	INF	Positive			326.2	52.3	0.019	0.035	0.02
CNMC 103	P103	A103	T103	INF	Positive			455.9	34.9	0.025	0.044	0.034
CNMC 108	P108	A108	NA	INF	Positive			186.9	10	0.031	0.038	NA
CNMC 109	P109	A109	NA	INF	Positive			170.6	10	0.021	0.016	NA
CNMC 005	NA	NA	T005	INF	Positive		Positive	355.6	10	NA	NA	0.028
CNMC 029	NA	NA	T029	INF	Positive			557	10	NA	NA	0.00834
CNMC 008	P008	NA	T008	INF	Positive			403.4	118.3	0.067	NA	0.012
CNMC 011	P011	NA	T011	INF	Positive			628	10	0.015	NA	0.023
CNMC 032	P032	NA	T032	INF	Positive			1247.7	24.5	0.014	NA	0.00317
CNMC 070	P070	NA	T070	INF	Positive			754.9	10	0.091	NA	0.11
CNMC 071	P071	NA	T071	INF	Positive			878.8	208.8	0.092	NA	0.048
CNMC 100	P100	NA	T100	INF	Positive			1089.4	10	0.024	NA	0.013
CNMC 102	P102	NA	T102	INF	Positive			1002.5	10	0.026	NA	0.00484
CNMC 104	P104	NA	T104	INF	Positive			67.5	10	0.00393	NA	0.00325
CNMC 111	P111	A111	T111	VAC	Indeterminate	Negative	Negative	65	10	0.00424	0.00152	0.001
CNMC 115	P115	A115	T115	VAC	Positive	Negative	Negative	3592	1416	0.15	0.041	0.022
CNMC 116	P116	A116	NA	VAC	Positive	Negative	Negative	618	10	0.012	0.00189	NA
CNMC 122	P122	A122	T122	VAC	Positive	Negative	Negative	2163	758	0.074	0.034	0.023
CNMC 124	P124	A124	NA	VAC	Positive	Negative	Negative	2943	790	0.15	0.025	NA
CNMC 125	P125	A125	NA	VAC	Positive	Negative	Negative	3396	1465	0.22	0.032	NA
CNMC 126	P126	A126	T126	VAC	Positive	Negative	Negative	289	45	0.081	0.031	0.026
CNMC 128	P128	A128	T128	VAC	Positive	Negative	Negative	285	30	0.038	0.043	0.027
CNMC 133	P133	A133	T133	VAC	Positive	Negative	Negative	230	138	0.031	0.017	0.00858
CNMC 113	P113	NA	T113	VAC	Positive	Negative	Negative	315	63	0.061	NA	0.046

## Sheet: 4. BSM Characteristics
Supplemental Table 4. Class switched memory B cell (BSM) characteristics
			% among S1+RBD+BSM				% among total BSM				% among S1+RBD+ BSM	% among total BSM	% among S1+RBD+ BSM				% among total BSM				% among S1+RBD+ BSM				% among total BSM				Count of S1+RBD+ B cells
	Participant ID	Tissue ID	CD21+CD27-	cMBC	acMBC	atMBC	CD21+CD27-	cMBC	acMBC	atMBC	CD69+	CD69+	IgA+	IgG+	IgA+IgG+	IgM+	IgA+	IG+	IgA+IgG+	IgM+	P1	P2	P3	P4	P1	P2	P3	P4
1	CNMC 001	P001	17.6	82.4	0	0	21.8	43.7	9.94	24.5	58.8	36.8	0	94.1	0	0	10.6	71.2	1.57	5.22	17.6	82.4	0	0	47.2	19.5	10.1	23.1	17
2	CNMC 008	P008	31.4	52.9	7.62	8.1	34.6	25.6	9.46	30.4	11.9	8.99	21.4	58.6	13.8	1.43	16.5	68.1	9.92	4.36	23.8	63.3	5.24	7.62	44.6	18.1	8.24	29.1	210
3	CNMC 011	P011	25	65.6	9.38	0	33.6	38.7	9.25	18.5	0	2.64	25	75	0	0	22.4	57	0.26	5.59	31.2	59.4	6.25	3.12	60.9	14.3	5.13	19.7	32
4	CNMC 032	P032	6.25	21.9	31.2	40.6	12	38.5	19.1	30.4	25	8.5	50	37.5	0	3.12	21	64.9	1.16	2.46	6.25	21.9	62.5	9.38	32.7	19.7	16.4	31.2	32
5	CNMC 050	P050	1.37	97.3	1.37	0	13.2	59.2	13.7	13.8	8.22	8.1	1.37	63	1.37	0	26.4	60.4	0.49	4.55	52.1	46.6	0	1.37	57.6	16.5	3.41	22.5	73
6	CNMC 070	P070	5.42	86.1	7.83	0.6	24.3	60.4	9.3	5.99	15.1	5.68	18.1	81.3	1.81	0	24.7	65.6	0.26	2.35	7.23	84.9	4.82	3.01	57.9	28.2	6.01	7.91	166
7	CNMC 071	P071	8.13	87	2.44	2.44	14	66.3	9.81	9.94	11.4	11	13.4	78	0.41	0	17.9	74.4	0.65	1.86	24.8	71.1	2.44	1.63	50.4	30.9	7.53	11.2	246
8	CNMC 091	P091	20	80	0	0	21.8	60.9	7.83	9.46	40	7.75	0	100	0	0	29.3	57.8	0.73	5.39	20	80	0	0	70.6	13.3	3.69	12.4	5
9	CNMC 100	P100	16.1	71	11.3	1.61	25.5	58.6	8.34	7.59	9.68	4.7	17.7	67.7	6.45	0	17.3	77.8	15.6	1.03	25.8	61.3	4.84	8.06	63.8	21.5	2.77	12	62
10	CNMC 101	P101	15.8	84.2	0	0	31.8	44	9.26	14.9	5.26	10.9	42.1	52.6	0	0	18.1	72.5	1.06	3.17	73.7	26.3	0	0	72.5	4.76	1.71	21.1	19
11	CNMC 102	P102	7.14	57.1	28.6	7.14	25	48.5	12.1	14.4	35.7	26.8	28.6	64.3	7.14	3.57	19	74	1.68	2.04	0	71.4	17.9	10.7	41.2	33.8	9.26	15.8	28
12	CNMC 103	P103	17.6	78.4	1.96	1.96	34.1	44.2	7.69	14	0	4.44	11.8	74.5	1.96	0	25.2	65.4	0.46	1.83	35.3	60.8	1.96	1.96	63.2	16.7	4.82	15.3	51
13	CNMC 104	P104	0	66.7	33.3	0	32.4	30.1	11.6	25.9	16.7	16.3	16.7	66.7	0	0	9.82	73.6	0.16	5.38	66.7	0	0	33.3	61.4	2.98	3.54	32	6
14	CNMC 108	P108	56.7	26.7	10	6.67	37.4	15.4	10.6	36.7	16.7	9.25	13.3	83.3	0	0	20.2	57.1	1.93	3.59	16.7	70	10	3.33	36.4	19.6	15.5	28.6	30
15	CNMC 109	P109	21.4	73.2	1.79	3.57	28.9	53.2	8.16	9.71	8.93	14.7	25	55.4	0	0	24	62.6	0.42	2.57	30.4	66.1	0	3.57	62.8	20.7	4.41	12.1	56
16	CNMC 111	P111	0	100	0	0	16.8	57.1	15	11.1	25	8.11	0	100	0	0	29.6	57.4	0.4	6.04	75	25	0	0	71.4	4.36	2.48	21.8	4
17	CNMC 113	P113	10.2	86.1	2.78	0.93	26.6	59.6	7.42	6.41	8.33	7.52	0	100	0	0	22.3	70.7	0.33	2.36	54.6	42.6	0.93	1.85	72.5	14.7	3.93	8.87	108
18	CNMC 115	P115	11.6	62.6	23.6	2.19	28.9	54.2	8.28	8.65	15.5	9.95	1.97	96.1	0.44	0	24.9	64.6	0.65	4.11	60.6	14.9	3.06	21.4	72.4	11.9	1.83	13.9	457
19	CNMC 116	P116	0	20	48.6	31.4	26.3	41.3	9.78	22.6	25.7	8.09	2.86	97.1	5.71	0	26	57.7	0.66	2.67	11.4	14.3	40	34.3	56.1	14	6.77	23.1	35
20	CNMC 122	P122	15.2	66.9	14.6	3.31	37.5	48.7	4.13	9.66	17.9	14.6	1.99	97.4	0	0	29.7	59	0.15	2.53	49.7	33.8	3.31	13.2	59.7	27.5	4.31	8.56	151
21	CNMC 124	P124	1.96	32.8	38.7	26.6	14	50.7	16.5	18.9	23.3	12.2	13.2	86.3	1.63	0.65	28.1	74.7	1.9	1.4	14.7	22.5	15	47.8	52.8	13.4	8.07	25.7	613
22	CNMC 125	P125	2.55	26.3	38.6	32.6	14.9	47.2	15.1	22.8	18.7	11	20.1	73.8	6.43	1	32.8	52.5	1.47	3.31	11.9	18.5	15.5	54.1	51.3	12.6	7.85	28.3	902
23	CNMC 126	P126	22.2	62.5	9.72	5.56	28.8	49.3	7.15	14.7	13.4	7.96	2.31	88	2.31	0.93	24.8	67.1	1.38	2.35	52.3	34.3	2.31	11.1	53	26.5	6.02	14.5	216
24	CNMC 128	P128	26.9	60	10	3.08	44.9	30.8	5.05	19.2	20	13.4	0	92.3	0.77	0	12.6	73.9	0.11	2.64	43.8	43.8	2.31	10	67.5	10.8	4.12	17.6	131
25	CNMC 133	P133	15	72.5	12.5	0	29	44.7	10.9	15.4	47.5	37.1	5	52.5	2.5	10	18	60.4	0.81	9.43	52.5	35	2.5	10	60.4	14.9	6.95	17.8	40
38	CNMC 001	A001	1.86	91.9	4.35	1.86	17.4	59.3	12.6	10.7	62.7	59.6	9.94	75.8	4.35	0	17.5	67.4	2.96	5.47	18	77	3.73	1.24	56.4	22.9	5.93	14.8	161
39	CNMC 016	A016	22.9	57	8.41	11.7	31.1	32.7	8.86	27.3	58.4	58.4	23.8	72.4	1.87	1.4	23.7	53.5	1.03	12.2	3.74	79.9	15.4	0.93	28.3	40.3	17.1	14.3	214
40	CNMC 022	A022	6.05	89	4.32	0.58	14.8	69.7	8.76	6.65	66.9	65.6	40.3	58.2	0.29	1.15	30.4	58.4	3.03	5.3	12.1	83.9	3.17	0.86	49.2	37.4	4.22	9.19	347
41	CNMC 041	A041	2.23	91.1	6.41	0.28	15.2	67.8	12.5	4.39	56.5	68.1	14.5	75.8	3.62	0.28	27.6	55.1	9.26	5.36	14.2	80.8	3.62	1.39	51.9	33.3	6.42	8.34	359
42	CNMC 046	A046	6.77	71.7	19.5	1.99	11.5	68.3	15.3	4.99	67.7	74.7	22.3	63.7	9.96	0.4	38.2	49.1	4.89	4.19	25.9	53.8	13.9	6.37	64.6	17.6	4.02	13.8	251
43	CNMC 050	A050	0.71	89.8	8.48	1.06	8.83	64.6	18.4	8.22	70	79.2	12.7	80.9	1.06	0	35.3	54.7	3.54	4.16	10.2	81.3	7.07	1.41	38.9	37.5	10.8	12.7	283
44	CNMC 069	A069	8.44	85.9	4.64	0.99	20.5	63.4	7.92	8.14	50	62.8	32.5	60.6	1.16	0	36.4	57.7	1.1	1.36	16.6	79	3.48	0.99	58.4	28	4.64	8.96	604
45	CNMC 087	A087	13.6	78	4.87	3.6	26.3	50.6	10	13	44.3	71.2	21.6	76.1	1.06	1.91	41.2	45.1	2.15	9.91	20.3	72.7	4.66	2.33	48.7	30.9	9.27	11.1	472
46	CNMC 089	A089	3.63	93.2	2.35	0.85	17.7	62.3	9.79	10.1	65	62.5	15	79.3	1.07	0	18.6	67.9	4.39	4.03	5.13	92.1	1.71	1.07	48	34.5	5.08	12.4	468
47	CNMC 091	A091	2.86	94.3	0	2.86	15	68.4	9.52	7.15	77.1	67.8	2.86	91.4	0	2.86	34.1	51.1	5.22	4.79	11.4	88.6	0	0	61.6	24	4.1	10.2	35
48	CNMC 101	A101	2.73	95.2	1.37	0.68	21.3	64.3	8.51	5.86	60.4	65.3	31.7	64.2	0.34	0	22.5	68	4.34	2.78	20.1	78.2	0.68	1.02	55.4	32	3.81	8.75	293
49	CNMC 103	A103	4.74	90.5	3.93	0.81	25.2	63.1	5.29	6.45	68.3	77.8	26	68.6	1.21	0.1	43.4	49.8	1.97	1.94	16.2	80.4	2.82	0.5	64.9	25.3	2.88	6.94	992
50	CNMC 108	A108	21.8	66.2	7.52	4.51	34.7	29.7	11.5	24.1	72.2	60.6	15.4	79.7	2.26	0	26.9	50	2.65	9.2	26.7	62.8	5.64	4.89	48.4	19.9	8.53	23.2	266
51	CNMC 109	A109	9.65	84.6	4.82	0.96	21.1	59.4	11.3	8.23	46.9	62.7	34.7	63	0	0.64	26.5	58.5	2.41	5.82	24.8	69.8	2.89	2.57	64.6	18.5	3.15	13.7	311
52	CNMC 111	A111	11.1	44.4	33.3	11.1	8.91	68	16.1	6.94	77.8	80.9	11.1	77.8	11.1	0	24.8	55.5	13.2	4.05	33.3	33.3	22.2	11.1	61.2	18.3	6.8	13.8	9
53	CNMC 115	A115	1.95	49.9	45.4	2.79	18.5	55.6	14.5	11.4	32.2	63.8	7.94	87.2	0.28	0.28	33.9	48.6	3.33	8.77	30.8	25.8	13	30.5	56.9	20.5	4.3	18.3	718
54	CNMC 116	A116	4	80	8	8	29.1	57.6	5.38	7.95	80	64.5	16	72	4	0	45.1	43.2	1.14	3.82	16	68	0	16	69.7	19	2.81	8.5	25
55	CNMC 122	A122	1.31	69.5	27.6	1.6	16.6	68	9.33	6.12	39.8	70.3	6.25	84	3.2	0.15	37.3	49	2.59	5.43	25	47.4	17.4	10.2	46.5	40.1	3.91	9.5	688
56	CNMC 124	A124	2.36	87	10.6	0	14.5	69.9	10.8	4.82	78	73.2	15.4	81.6	1.65	0	33	54.9	4.05	4.58	16.5	74.9	7.33	1.18	63.5	23	4.01	9.48	423
57	CNMC 125	A125	2.42	89.7	6.67	1.21	19.3	68.3	7.04	5.34	75.6	73.6	22.2	75.6	1.01	0	31.1	55.2	3.15	5.84	21.8	71.7	4.44	2.02	68.8	20.8	2.13	8.3	495
58	CNMC 126	A126	1.96	80.4	16.5	1.12	15	67.8	11.8	5.42	38	61.2	5.59	84.1	1.68	0.56	34.7	56.7	2.13	4.07	43	41.9	6.15	8.94	52	33.3	6.11	8.55	358
59	CNMC 128	A128	3.32	90.5	5.48	0.72	20.5	61	9.72	8.78	64.4	71.9	3.32	92.6	0.29	0	20.5	69.6	1.22	5.32	53.1	42	1.44	3.46	72.1	12.5	2.23	13.2	693
60	CNMC 133	A133	1.99	89.6	7.96	0.5	25.7	64	5.58	4.66	63.2	79.6	4.48	88.6	0.5	0.5	15.4	67.1	1.61	10.2	48.8	43.3	1	6.97	70.1	21.2	2.27	6.4	201
70	CNMC 001	T001	1.2	95.2	3.61	0	17.1	56.3	14.9	11.7	69.9	61.7	4.82	88	0	0	12.8	73.6	2.24	4.78	16.9	80.7	1.2	1.2	55.3	20.7	5.43	18.5	83
71	CNMC 005	T005	3.86	88.4	6.67	1.05	13.6	66.1	13.7	6.68	70.9	66.2	19.6	72.3	3.86	0	22.7	65	3.29	3.82	10.9	83.2	4.91	1.05	50.8	31.3	4.41	13.5	285
72	CNMC 008	T008	7.14	78	12.5	2.38	23.4	29.9	22.6	24.1	32.7	43.3	35.1	61.9	0	0	14.2	66.4	2.83	9.01	14.3	73.8	9.52	2.38	47.5	10.6	6.27	35.6	168
73	CNMC 011	T011	3.91	87.2	8.9	0	14.9	65.5	14.6	4.97	58	72.9	22.8	71.9	1.78	0	29.5	55.9	3.59	4.67	39.5	52.7	2.14	5.69	71	12.1	1.92	15	281
74	CNMC 016	T016	3.66	88.5	6.28	1.57	13	63.4	16.9	6.6	74.3	64.9	25.1	68.1	2.62	0	23.3	57.8	6.57	8.46	5.76	86.4	7.33	0.52	43.2	35.7	7.11	14	191
75	CNMC 022	T022	2.76	93.4	3.4	0.42	7.12	73.5	15	4.42	64.5	71.1	36.1	60.1	1.27	0.21	21.5	70.4	3.33	1.52	12.1	84.7	2.12	1.06	48.2	35	5.07	11.7	471
76	CNMC 029	T029	4.23	86.6	8.45	0.7	13.5	57.1	22.6	6.85	44.4	58.5	28.2	69	1.41	0	19.4	64.5	8.35	1.66	25.4	66.9	4.93	2.82	57.3	16.3	3.26	23.2	142
77	CNMC 032	T032	0	69.2	15.4	15.4	14.2	58.7	19.2	7.9	61.5	68.1	38.5	38.5	0	0	23.8	61.2	4.6	1.1	38.5	30.8	23.1	7.69	58.3	17.4	3.12	21.3	13
78	CNMC 041	T041	6.68	86.3	6.11	0.95	18.5	50.5	15.4	15.5	63.2	61.6	13.9	80.5	1.91	0	21.1	62.4	5.5	4.42	21.8	71.8	2.86	3.63	52	20.3	6.19	21.5	524
79	CNMC 046	T046	2.67	87.1	9.78	0.44	9.08	58.3	25.2	7.46	54.7	65.5	24.4	69.8	2.67	0	27.2	57	7.37	3.24	21.8	68.9	4.44	4.89	55.2	15.4	5.91	23.5	225
80	CNMC 050	T050	3.21	91	5.77	0	8.01	52.4	30.5	9.13	62.8	73.4	7.69	90.4	0	0	22.2	60.2	11.6	2.8	21.2	73.1	3.85	1.92	40.3	23.3	9.43	27	156
81	CNMC 069	T069	2.01	91	6.02	1	15.8	59.2	17.1	7.82	43.5	57.4	26.8	65.6	4.35	0	22.4	65.6	3.42	2.24	15.1	78.6	2.68	3.68	55.4	22.3	4.19	18.1	299
82	CNMC 070	T070	3.82	88.9	6.53	0.8	14.9	60.8	18.1	6.23	64	63.5	18.3	74.7	4.92	0.5	27.4	56	6.24	5.58	7.83	86.4	3.61	2.11	56.4	22.6	3.56	17.5	996
83	CNMC 071	T071	3.64	91.8	4.01	0.55	12.9	67	13.9	6.27	62.7	65.9	13.3	83.6	1.28	0.18	18.6	72	2.31	2.17	22	74.5	2	1.46	52.1	30.5	5	12.4	549
84	CNMC 087	T087	8.07	87.9	2.88	1.15	18.8	59.2	14.6	7.45	51.3	64	20.2	78.4	0.58	0.29	23.4	58.3	4.57	8.69	20.7	76.4	2.02	0.86	57.5	23.1	6.2	13.3	347
85	CNMC 089	T089	2.26	92.2	4.81	0.75	14.7	58.4	18.4	8.56	60.2	58.2	14.1	83.5	0.9	0	19.7	65.8	4.59	4.59	11.4	84.5	2.26	1.8	50.1	25.7	4.8	19.5	665
86	CNMC 091	T091	0	97.4	2.63	0	16	66.1	12.2	5.65	92.1	65.6	2.63	92.1	2.63	0	27.4	51.3	9.62	4.7	2.63	94.7	2.63	0	61.1	23.5	3.95	11.4	38
87	CNMC 100	T100	5.67	87.2	7.09	0	22.4	59.9	10.8	6.87	70.9	51.8	12.8	76.6	2.13	1.42	16.8	71.6	3.69	3.79	11.3	83	2.84	2.84	54.2	30.5	4.03	11.3	141
88	CNMC 101	T101	4.51	89.6	5.9	0	19.4	60.5	13	7.07	64.9	67	24	71.9	2.78	0	19.9	69.4	5.25	2.3	29.2	66.3	2.43	2.08	60.1	22.4	2.93	14.5	288
89	CNMC 102	T102	3.33	71.7	23.3	1.67	17.8	61.5	12.9	7.9	75	65.4	18.3	66.7	5	0	19.1	72	1.77	3.27	6.67	71.7	15	6.67	51.8	30.6	4.67	13	60
90	CNMC 103	T103	2.23	94.4	3.17	0.19	20.5	64.1	8.56	6.9	75.4	72.3	23.8	71.5	1.68	0	32.3	56.2	4.86	1.66	20.5	77.1	1.86	0.56	66.3	20.5	2.68	10.5	537
91	CNMC 104	T104	18.5	63	7.41	11.1	25.6	40.7	18.1	15.6	51.9	56.9	3.7	96.3	0	0	10.6	71.1	3.85	5.41	29.6	51.9	7.41	11.1	62.5	7.62	2.87	27	27
92	CNMC 111	T111	0	60	20	20	10.4	54.4	19.5	15.7	60	67.6	20	80	0	0	20	58.8	10.4	4.89	40	20	0	40	56.6	11.5	4.79	27.1	5
93	CNMC 113	T113	4.38	81	13.1	1.46	19.1	57.7	13.3	9.8	50.4	72.4	4.38	90.5	0	0	20.5	61.9	1.78	9.8	52.7	35.4	4.56	7.3	67	12.5	2.87	17.6	548
94	CNMC 115	T115	3.99	50.3	43.3	2.45	26.4	43.6	12.2	17.8	22.1	47	6.75	92	0	0	23	46.2	2.45	14.8	31.6	26.4	13.8	28.2	57.5	16.4	5.95	20.2	326
95	CNMC 122	T122	2.33	65.8	29.2	2.66	12.6	64.8	14.2	8.41	36.9	67.7	4.32	83.1	6.98	0	30.1	52.4	7.66	4.06	30.2	41.5	14.6	13.6	50.9	29.2	3.52	16.4	301
96	CNMC 126	T126	2.53	79.7	15.8	1.9	10.3	66.6	16.5	6.6	37.7	56.7	4.75	85.8	2.22	0	30.8	59.1	4.12	3.16	46.8	36.4	6.33	10.4	50.7	29.3	5.56	14.4	316
97	CNMC 128	T128	2.13	86.3	10	1.52	15.9	57.8	14.6	11.8	64.7	66.5	4.26	91.5	0.91	0.61	19.2	62.3	1.23	11.5	38	53.2	2.43	6.38	61.5	15.8	3.68	19.1	329
98	CNMC 133	T133	3.33	86.7	8.89	1.11	28.1	50.4	10.7	10.7	48.9	65.4	2.22	94.4	0	1.11	14.7	64.8	3.19	12.9	33.3	58.9	3.33	4.44	59.5	21.9	5.14	13.4	90

## Sheet: 5. Freq of Clusters in PBMC
Supplemental Table 5. Frequency of each cluster (PBMC)
	Participant ID	Tissue ID	Cluster_1	Cluster_2	Cluster_3	Cluster_4	Cluster_5	Cluster_6	Cluster_7	Cluster_8	Cluster_9	Cluster_10	Cluster_11	Cluster_12	Age	Sex	Group	Tonsil_condition
1	CNMC 001	P001	0	0.470588	0	0	0.294118	0.117647	0	0.0588235	0	0.0588235	0	0	2.6	Female	INF	SDB
2	CNMC 008	P008	0.00900901	0.0225225	0.0045045	0.00900901	0.0855856	0.45045	0.00900901	0.036036	0.027027	0.211712	0.0045045	0.130631	3.4	Male	INF	Mild OSA
3	CNMC 011	P011	0	0.0882353	0.0294118	0	0.117647	0.176471	0	0.117647	0.0588235	0.235294	0	0.176471	8	Male	INF	Mild OSA
4	CNMC 032	P032	0	0.0952381	0.0952381	0	0.015873	0	0.0634921	0.0634921	0.31746	0.333333	0	0.015873	3.6	Female	INF	Severe OSA
5	CNMC 050	P050	0.0618557	0.195876	0	0.0103093	0.257732	0.0515464	0	0.247423	0.123711	0.0309278	0	0.0206186	2.9	Female	INF	SDB
6	CNMC 070	P070	0	0.552632	0.0157895	0	0.0105263	0.0684211	0	0.0842105	0.0736842	0.173684	0	0.0210526	16.4	Male	INF	Mild OSA
7	CNMC 071	P071	0.0640569	0.338078	0.00711744	0.0106762	0.0711744	0.163701	0.0106762	0.142349	0.0391459	0.135231	0.00355872	0.0142349	6.2	Female	INF	SDB
8	CNMC 091	P091	0	0.0833333	0	0	0.0833333	0.0833333	0.0833333	0.166667	0.416667	0	0	0.0833333	9.2	Male	INF	Moderate OSA
9	CNMC 100	P100	0.0224719	0.11236	0.0449438	0	0.0449438	0.168539	0	0.157303	0.269663	0.134831	0.011236	0.0337079	4.7	Female	INF	Mild OSA
10	CNMC 101	P101	0.130435	0.0434783	0	0	0.173913	0	0	0.217391	0.0869565	0.347826	0	0	4.6	Male	INF	SDB
11	CNMC 102	P102	0	0.153846	0.128205	0.025641	0	0.205128	0.025641	0.0512821	0.205128	0.179487	0.025641	0	5.1	Male	INF	SDB
12	CNMC 103	P103	0	0.0704225	0	0.0140845	0.295775	0.253521	0.0140845	0.0422535	0.15493	0.0985915	0	0.056338	8.1	Male	INF	Mild OSA
13	CNMC 104	P104	0.0769231	0	0	0	0.153846	0	0	0.0769231	0.461538	0.0769231	0	0.153846	6.8	Male	INF	SDB
14	CNMC 108	P108	0.0227273	0.204545	0	0	0.0681818	0.340909	0.0681818	0	0.0909091	0.159091	0	0.0454545	4.2	Female	INF	ETD
15	CNMC 109	P109	0.0125	0.2125	0.0375	0	0.2625	0.1375	0.025	0.025	0.0875	0.1875	0	0.0125	5.1	Male	INF	SDB
16	CNMC 111	P111	0	0	0	0	0.0714286	0	0	0.142857	0.714286	0	0	0.0714286	10.2	Male	VAC	SDB
17	CNMC 113	P113	0.17094	0.25641	0.00854701	0	0.188034	0.034188	0	0.25641	0.0598291	0	0	0.025641	13.1	Female	VAC	Chronic tonsillitis, recurrent strep
18	CNMC 115	P115	0.568789	0.0349076	0.0410678	0.00205339	0.151951	0.0225873	0.00205339	0.112936	0.00821355	0.0225873	0	0.0328542	19.3	Female	VAC	Recurrent tonsillits
19	CNMC 116	P116	0.06	0.06	0.3	0.1	0.04	0.06	0.16	0.02	0.14	0.02	0	0.04	5.6	Male	VAC	SDB
20	CNMC 122	P122	0.358025	0.160494	0.0308642	0	0.148148	0.0432099	0	0.185185	0.0308642	0.0185185	0	0.0246914	17	Female	VAC	Chronic tonsillitis/tonsil stones
21	CNMC 124	P124	0.0977654	0.0502793	0.243017	0.226257	0.0349162	0.0349162	0.196927	0.00418994	0.0209497	0.0111732	0.0768156	0.0027933	5.7	Male	VAC	SDB
22	CNMC 125	P125	0.049571	0.0314585	0.172545	0.219256	0.0352717	0.042898	0.195424	0.013346	0.0409914	0.0400381	0.149666	0.00953289	5.7	Male	VAC	SDB
23	CNMC 126	P126	0.106122	0.183673	0.0285714	0.00408163	0.228571	0.0693878	0	0.17551	0.0816327	0.0163265	0	0.106122	6.3	Female	VAC	Moderate OSA
24	CNMC 128	P128	0.068323	0.167702	0.0248447	0	0.15528	0.180124	0.00621118	0.15528	0.0931677	0	0	0.149068	11	Female	VAC	Chronic tonsillitis (secondary diagnosis SDB)
25	CNMC 133	P133	0.152778	0.0416667	0.0138889	0	0.0416667	0.0138889	0	0.236111	0.458333	0.0277778	0	0.0138889	8.3	Male	VAC	Mild OSA

## Sheet: 6. Freq of Clusters in tissues
Supplemental Table 6. Frequency of each cluster (tonsil and adenoid)
	Participant ID	Tissue ID	Cluster_1	Cluster_2	Cluster_3	Cluster_4	Cluster_5	Cluster_6	Cluster_7	Cluster_8	Cluster_9	Cluster_10	Cluster_11	Cluster_12	Cluster_13	Cluster_14	Age	Sex	Group	Tonsil_condition
1	CNMC 001	A001	0.278261	0.1	0.126087	0.0608696	0.0608696	0.0695652	0.0347826	0.0391304	0.0434783	0.00869565	0.165217	0	0.0130435	0	2.6	Female	INF	SDB
2	CNMC 016	A016	0.399293	0.0388693	0.0954064	0.19788	0.106007	0.00706714	0	0.116608	0.0176678	0.0106007	0.00353357	0	0.00353357	0.00353357	8.9	Female	INF	SDB
3	CNMC 022	A022	0.148235	0.0894118	0.0894118	0.287059	0.157647	0.0305882	0.00470588	0.0423529	0.0258824	0.0682353	0.00470588	0.0470588	0.00470588	0	4.1	Male	INF	Mild OSA
4	CNMC 041	A041	0.139535	0.0733453	0.0876565	0.0948122	0.157424	0.148479	0.112701	0.0143113	0.0375671	0.0697674	0.0518784	0.00715564	0.00536673	0	6	Female	INF	Severe OSA
5	CNMC 046	A046	0.0969072	0.16701	0.0371134	0.208247	0.17732	0.0494845	0.0721649	0.00412371	0.0824742	0.0123711	0.0701031	0.0123711	0.00824742	0.00206186	7.2	Male	INF	SDB
6	CNMC 050	A050	0.242515	0.107784	0.221557	0.107784	0.185629	0.00299401	0.0179641	0.0628743	0.0149701	0.0239521	0.00299401	0.00299401	0.00598802	0	2.9	Female	INF	SDB
7	CNMC 069	A069	0.208276	0.133793	0.0758621	0.251034	0.113103	0.0537931	0.0137931	0.0303448	0.0151724	0.062069	0.00689655	0.0331034	0.00137931	0.00137931	3.4	Female	INF	SDB
8	CNMC 087	A087	0.224779	0.173451	0.136283	0.19823	0.182301	0.00176991	0.0336283	0.0176991	0.0123894	0.00884956	0	0.00176991	0.00884956	0	6	Male	INF	SDB
9	CNMC 089	A089	0.306818	0.0549242	0.339015	0.121212	0.0435606	0.0151515	0.0189394	0.0170455	0.0208333	0.0454545	0	0.0132576	0.00378788	0	12.1	Female	INF	SDB
10	CNMC 091	A091	0.0819672	0.0655738	0.245902	0.0163934	0.245902	0.0491803	0.0163934	0.196721	0	0	0.0327869	0	0.0163934	0.0327869	9.2	Male	INF	Moderate OSA
11	CNMC 101	A101	0.201863	0.173913	0.118012	0.282609	0.0931677	0.00621118	0.0310559	0.0217391	0.0124224	0.0341615	0	0.0217391	0.00310559	0	4.6	Male	INF	SDB
12	CNMC 103	A103	0.178378	0.157658	0.177477	0.228829	0.125225	0.0171171	0.018018	0.0441441	0.0198198	0.018018	0.0018018	0.00990991	0.0036036	0	8.1	Male	INF	Mild OSA
13	CNMC 108	A108	0.143223	0.186701	0.0971867	0.0818414	0.240409	0.0997442	0.0102302	0.0179028	0.028133	0.0102302	0.0613811	0.00767263	0.0127877	0.00255754	4.2	Female	INF	ETD
14	CNMC 109	A109	0.266667	0.210667	0.0293333	0.290667	0.0613333	0.0106667	0.0106667	0.072	0.0133333	0.00533333	0.00533333	0.0186667	0.00533333	0	5.1	Male	INF	SDB
15	CNMC 111	A111	0.0526316	0	0.210526	0	0	0.105263	0.105263	0.157895	0.157895	0	0.0526316	0	0.157895	0	10.2	Male	VAC	SDB
16	CNMC 115	A115	0.216883	0.519481	0.0480519	0.0714286	0.00909091	0.0038961	0.0922078	0.0181818	0.00779221	0.00649351	0	0	0.00649351	0	19.3	Female	VAC	Recurrent tonsillits
17	CNMC 116	A116	0.0487805	0.097561	0.195122	0.0731707	0.097561	0.0243902	0.0487805	0.146341	0.121951	0	0.0487805	0	0.097561	0	5.6	Male	VAC	SDB
18	CNMC 122	A122	0.358366	0.321476	0.0922266	0.055336	0.0869565	0	0.0527009	0.0171278	0.0144928	0	0.00131752	0	0	0	17	Female	VAC	Chronic tonsillitis/tonsil stones
19	CNMC 124	A124	0.209354	0.129176	0.376392	0.13363	0.0467706	0.00445434	0.0311804	0.013363	0.0334076	0.00668151	0.00890869	0.00222717	0.00445434	0	5.7	Male	VAC	SDB
20	CNMC 125	A125	0.149446	0.166052	0.293358	0.191882	0.0498155	0.0129151	0.0535055	0.0239852	0.0350554	0.00369004	0.0110701	0.00369004	0.00184502	0.00369004	5.7	Male	VAC	SDB
21	CNMC 126	A126	0.207944	0.338785	0.0303738	0.0420561	0.0841121	0.0163551	0.224299	0.0280374	0.0163551	0.00700935	0.00233645	0.00233645	0	0	6.3	Female	VAC	Moderate OSA
22	CNMC 128	A128	0.197889	0.514512	0.0870712	0.025066	0.0593668	0.00659631	0.0237467	0.0343008	0.0184697	0.0290237	0	0.00395778	0	0	11	Female	VAC	Chronic tonsillitis (secondary diagnosis SDB)
23	CNMC 133	A133	0.0950704	0.408451	0.0528169	0.0316901	0.126761	0.0211268	0.197183	0.0211268	0.0140845	0	0.00704225	0	0.0176056	0.00704225	8.3	Male	VAC	Mild OSA
24	CNMC 001	T001	0.333333	0.172414	0.264368	0.045977	0.103448	0.0114943	0.0114943	0.0344828	0.0114943	0.0114943	0	0	0	0	2.6	Female	INF	SDB
25	CNMC 005	T005	0.200573	0.0716332	0.249284	0.154728	0.034384	0.0974212	0.0286533	0.0515759	0.0229226	0.0515759	0.00286533	0.0286533	0.00573066	0	7.5	Female	INF	SDB
26	CNMC 008	T008	0.305263	0.136842	0.00526316	0.247368	0.0421053	0.0368421	0	0.00526316	0.0210526	0.105263	0.0105263	0.0578947	0.0105263	0.0157895	3.4	Male	INF	Mild OSA
27	CNMC 011	T011	0.175342	0.252055	0.0794521	0.172603	0.00821918	0.150685	0.0356164	0.0547945	0.0410959	0	0.0246575	0	0	0.00547945	8	Male	INF	Mild OSA
28	CNMC 016	T016	0.183036	0.0491071	0.272321	0.214286	0.125	0.0580357	0.00892857	0.0491071	0.03125	0	0.00892857	0	0	0	8.9	Female	INF	SDB
29	CNMC 022	T022	0.178641	0.0932039	0.192233	0.28932	0.0660194	0.0038835	0.0135922	0.0194175	0.0116505	0.0660194	0.00582524	0.0524272	0.00776699	0	4.1	Male	INF	Mild OSA
30	CNMC 029	T029	0.32716	0.191358	0.0802469	0.222222	0.0617284	0.0308642	0	0.0246914	0.0493827	0.00617284	0.00617284	0	0	0	3.1	Male	INF	SDB
31	CNMC 032	T032	0.0555556	0.0925926	0	0.0925926	0.0555556	0.277778	0.0185185	0.111111	0.0555556	0	0.222222	0.0185185	0	0	3.6	Female	INF	Severe OSA
32	CNMC 041	T041	0.21021	0.165165	0.181682	0.111111	0.0600601	0.126126	0.036036	0.0135135	0.03003	0.045045	0.00600601	0.0105105	0	0.0045045	6	Female	INF	Severe OSA
33	CNMC 046	T046	0.190311	0.131488	0.134948	0.176471	0.0484429	0.134948	0.0484429	0.0276817	0.0484429	0.0311419	0.00692042	0.00692042	0.00692042	0.00692042	7.2	Male	INF	SDB
34	CNMC 050	T050	0.323529	0.194118	0.205882	0.0529412	0.0588235	0.0117647	0.00588235	0.0411765	0.0235294	0.0352941	0.0352941	0.0117647	0	0	2.9	Female	INF	SDB
35	CNMC 069	T069	0.306306	0.123123	0.12012	0.204204	0.036036	0.003003	0.00600601	0.0570571	0.027027	0.048048	0.024024	0.042042	0.003003	0	3.4	Female	INF	SDB
36	CNMC 070	T070	0.171233	0.0393836	0.122717	0.0998858	0.118151	0.314498	0.00399543	0.0176941	0.0291096	0.00513699	0.0730594	0.000570776	0.00171233	0.00285388	16.4	Male	INF	Mild OSA
37	CNMC 071	T071	0.245409	0.180301	0.238731	0.106845	0.066778	0.00166945	0.0367279	0.0417362	0.0233723	0.0383973	0	0.015025	0.0033389	0.00166945	6.2	Female	INF	SDB
38	CNMC 087	T087	0.29765	0.164491	0.138381	0.193211	0.0913838	0.0261097	0.0261097	0.0208877	0.0208877	0.00261097	0.0104439	0	0	0.0078329	6	Male	INF	SDB
39	CNMC 089	T089	0.295125	0.0922266	0.239789	0.114625	0.0329381	0.0909091	0.030303	0.0171278	0.0210804	0.0461133	0.0118577	0.00658762	0.00131752	0	12.1	Female	INF	SDB
40	CNMC 091	T091	0.0357143	0	0.410714	0	0.214286	0.0535714	0.0178571	0.107143	0.0357143	0.0357143	0.0535714	0	0.0178571	0.0178571	9.2	Male	INF	Moderate OSA
41	CNMC 100	T100	0.171429	0.0571429	0.161905	0.0809524	0.138095	0.142857	0.0142857	0.0952381	0.0380952	0.0571429	0.0190476	0	0.0190476	0.0047619	4.7	Female	INF	Mild OSA
42	CNMC 101	T101	0.184049	0.233129	0.144172	0.196319	0.0552147	0.0276074	0.0337423	0.0214724	0.0398773	0.0306748	0.00920245	0.0153374	0.00613497	0.00306748	4.6	Male	INF	SDB
43	CNMC 102	T102	0.152174	0.0326087	0.228261	0.119565	0.108696	0.0434783	0.0434783	0.0978261	0.0978261	0.0108696	0.0326087	0	0.0326087	0	5.1	Male	INF	SDB
44	CNMC 103	T103	0.181513	0.173109	0.263866	0.203361	0.0302521	0.0168067	0.0201681	0.0218487	0.0218487	0.0252101	0.00840336	0.0117647	0.00168067	0.0201681	8.1	Male	INF	Mild OSA
45	CNMC 104	T104	0.172414	0.103448	0.0517241	0.0172414	0	0.327586	0	0.189655	0.0344828	0.0344828	0.0344828	0	0.0344828	0	6.8	Male	INF	SDB
46	CNMC 111	T111	0	0.166667	0.166667	0.0833333	0	0	0	0.416667	0.0833333	0	0	0	0	0.0833333	10.2	Male	VAC	SDB
47	CNMC 113	T113	0.214168	0.5486	0.0593081	0.0362438	0.0444811	0.00329489	0.0576606	0.0181219	0.00988468	0.00658979	0.00164745	0	0	0	13.1	Female	VAC	Chronic tonsillitis, recurrent strep
48	CNMC 115	T115	0.251445	0.523121	0.0231214	0.0635838	0.00867052	0	0.104046	0.0144509	0.00289017	0	0.00289017	0	0.00289017	0.00289017	19.3	Female	VAC	Recurrent tonsillits
49	CNMC 122	T122	0.316923	0.329231	0.08	0.04	0.0646154	0.00307692	0.12	0.00923077	0.0307692	0	0.00307692	0	0.00307692	0	17	Female	VAC	Chronic tonsillitis/tonsil stones
50	CNMC 126	T126	0.197772	0.420613	0.0529248	0.0445682	0.0501393	0	0.172702	0.00835655	0.0250696	0.00557103	0.00278552	0	0.0167131	0.00278552	6.3	Female	VAC	Moderate OSA
51	CNMC 128	T128	0.189041	0.410959	0.186301	0.0410959	0.0493151	0	0.0109589	0.0630137	0.0164384	0.030137	0.00273973	0	0	0	11	Female	VAC	Chronic tonsillitis (secondary diagnosis SDB)
52	CNMC 133	T133	0.236364	0.272727	0.118182	0.0181818	0.0727273	0	0.0545455	0.0454545	0.00909091	0.0545455	0	0	0.109091	0.00909091	8.3	Male	VAC	Mild OSA

## Sheet: 7. GC B cell Description
Supplemental Table 7. Germinal center B cells
				IgG GC B		IgA GC B		IgM GC B		Sum
Participant ID	Tissue	Group	Total S1+RBD+ B cells	Number of cells in cluster 6	Cluster 6 Frequency	Number of cells in cluster 11	Cluster 11 Frequency	Number of cells in cluster 13	Cluster 13 Frequency	Total number of GC B cells (IgG+ / IgA+ / IgM+)	Total frequency of GC B cells (IgG+ / IgA+ / IgM+)
CNMC 001	Adenoid	INF	230	16	0.0695652	38	0.165217	3	0.0130435	57	0.247826
CNMC 016	Adenoid	INF	283	2	0.00706714	1	0.00353357	1	0.00353357	4	0.0141343
CNMC 022	Adenoid	INF	425	13	0.0305882	2	0.00470588	2	0.00470588	17	0.04
CNMC 041	Adenoid	INF	559	83	0.148479	29	0.0518784	3	0.00536673	115	0.205725
CNMC 046	Adenoid	INF	485	24	0.0494845	34	0.0701031	4	0.00824742	62	0.127835
CNMC 050	Adenoid	INF	334	1	0.00299401	1	0.00299401	2	0.00598802	4	0.011976
CNMC 069	Adenoid	INF	725	39	0.0537931	5	0.00689655	1	0.00137931	45	0.062069
CNMC 087	Adenoid	INF	565	1	0.00176991	0	0	5	0.00884956	6	0.0106195
CNMC 089	Adenoid	INF	528	8	0.0151515	0	0	2	0.00378788	10	0.0189394
CNMC 091	Adenoid	INF	61	3	0.0491803	2	0.0327869	1	0.0163934	6	0.0983607
CNMC 101	Adenoid	INF	322	2	0.00621118	0	0	1	0.00310559	3	0.00931677
CNMC 103	Adenoid	INF	1110	19	0.0171171	2	0.0018018	4	0.0036036	25	0.0225225
CNMC 108	Adenoid	INF	391	39	0.0997442	24	0.0613811	5	0.0127877	68	0.173913
CNMC 109	Adenoid	INF	375	4	0.0106667	2	0.00533333	2	0.00533333	8	0.0213333
CNMC 111	Adenoid	VAC	19	2	0.105263	1	0.0526316	3	0.157895	6	0.315789
CNMC 115	Adenoid	VAC	770	3	0.0038961	0	0	5	0.00649351	8	0.0103896
CNMC 116	Adenoid	VAC	41	1	0.0243902	2	0.0487805	4	0.097561	7	0.170732
CNMC 122	Adenoid	VAC	759	0	0	1	0.00131752	0	0	1	0.00131752
CNMC 124	Adenoid	VAC	449	2	0.00445434	4	0.00890869	2	0.00445434	8	0.0178174
CNMC 125	Adenoid	VAC	542	7	0.0129151	6	0.0110701	1	0.00184502	14	0.0258303
CNMC 126	Adenoid	VAC	428	7	0.0163551	1	0.00233645	0	0	8	0.0186916
CNMC 128	Adenoid	VAC	758	5	0.00659631	0	0	0	0	5	0.00659631
CNMC 133	Adenoid	VAC	284	6	0.0211268	2	0.00704225	5	0.0176056	13	0.0457746
CNMC 001	Tonsil	INF	87	1	0.0114943	0	0	0	0	1	0.0114943
CNMC 005	Tonsil	INF	349	34	0.0974212	1	0.00286533	2	0.00573066	37	0.106017
CNMC 008	Tonsil	INF	190	7	0.0368421	2	0.0105263	2	0.0105263	11	0.0578947
CNMC 011	Tonsil	INF	365	55	0.150685	9	0.0246575	0	0	64	0.175342
CNMC 016	Tonsil	INF	224	13	0.0580357	2	0.00892857	0	0	15	0.0669643
CNMC 022	Tonsil	INF	515	2	0.0038835	3	0.00582524	4	0.00776699	9	0.0174757
CNMC 029	Tonsil	INF	162	5	0.0308642	1	0.00617284	0	0	6	0.037037
CNMC 032	Tonsil	INF	54	15	0.277778	12	0.222222	0	0	27	0.5
CNMC 041	Tonsil	INF	666	84	0.126126	4	0.00600601	0	0	88	0.132132
CNMC 046	Tonsil	INF	289	39	0.134948	2	0.00692042	2	0.00692042	43	0.148789
CNMC 050	Tonsil	INF	170	2	0.0117647	6	0.0352941	0	0	8	0.0470588
CNMC 069	Tonsil	INF	333	1	0.003003	8	0.024024	1	0.003003	10	0.03003
CNMC 070	Tonsil	INF	1752	551	0.314498	128	0.0730594	3	0.00171233	682	0.389269
CNMC 071	Tonsil	INF	599	1	0.00166945	0	0	2	0.0033389	3	0.00500835
CNMC 087	Tonsil	INF	383	10	0.0261097	4	0.0104439	0	0	14	0.0365535
CNMC 089	Tonsil	INF	759	69	0.0909091	9	0.0118577	1	0.00131752	79	0.104084
CNMC 091	Tonsil	INF	56	3	0.0535714	3	0.0535714	1	0.0178571	7	0.125
CNMC 100	Tonsil	INF	210	30	0.142857	4	0.0190476	4	0.0190476	38	0.180952
CNMC 101	Tonsil	INF	326	9	0.0276074	3	0.00920245	2	0.00613497	14	0.0429448
CNMC 102	Tonsil	INF	92	4	0.0434783	3	0.0326087	3	0.0326087	10	0.108696
CNMC 103	Tonsil	INF	595	10	0.0168067	5	0.00840336	1	0.00168067	16	0.0268908
CNMC 104	Tonsil	INF	58	19	0.327586	2	0.0344828	2	0.0344828	23	0.396552
CNMC 111	Tonsil	VAC	12	0	0	0	0	0	0	0	0
CNMC 113	Tonsil	VAC	607	2	0.00329489	1	0.00164745	0	0	3	0.00494234
CNMC 115	Tonsil	VAC	346	0	0	1	0.00289017	1	0.00289017	2	0.00578035
CNMC 122	Tonsil	VAC	325	1	0.00307692	1	0.00307692	1	0.00307692	3	0.00923077
CNMC 126	Tonsil	VAC	359	0	0	1	0.00278552	6	0.0167131	7	0.0194986
CNMC 128	Tonsil	VAC	365	0	0	1	0.00273973	0	0	1	0.00273973
CNMC 133	Tonsil	VAC	110	0	0	0	0	12	0.109091	12	0.109091

## Sheet: 8. CITE-seq Samples
Supplemental Table 8. Samples sequenced with CITE-seq
Set ID	COVID Status	Participant ID	Sample Type	Age (year)	Sex	Time from last vaccine infection to surgery	Tonsil Disorder
2021	INF	CNMC 071	PBMC	6.2	F	71	SDB
			Adenoid
			Tonsil
		CNMC 089	PBMC	12.1	F		SDB
			Adenoid
			Tonsil
	CON	CNMC 099	PBMC	7.1	M		Mild OSA
			Adenoid
			Tonsil
306-3	INF	CNMC 022	Tonsil	4.1	Male	108	Mild OSA
	INF	CNMC 070	Tonsil	16.4	Male	98	Mild OSA
	CON	CNMC 010	Tonsil	4.5	Female		SDB
306-4- Set A	VAC	CNMC 126	Tonsil	6.3	Female	109	SDB
	VAC	CNMC 133	Tonsil	8.3	Male	232	SDB
	INF	CNMC 101	Tonsil	4.6	Male		SDB
	INF	CNMC 103	Tonsil	8.1	Male	303	Mild OSA
	CON	CNMC 010	Tonsil	4.5	Female		SDB
306-4- Set B	VAC	CNMC 124*	Adenoid	5.7	Male	27	SDB
	VAC	CNMC 125*	Adenoid	5.7	Male	27	SDB
	INF	CNMC 050	Adenoid	2.9	Female	31	SDB
	INF	CNMC 103	Adenoid	8.1	Male	303	Mild OSA
	CON	CNMC 010	Tonsil	4.5	Female		SDB
306-4- Set C	VAC	CNMC 133	Adenoid	8.3	Male	232	SDB
	INF	CNMC 101	Adenoid	4.6	Male		SDB
	INF	CNMC 109	Adenoid	5.1	Male		SDB
	CON	CNMC 010	Tonsil	4.5	Female		SDB
		* CNMC 124 and CNMC 125 are fraternal twins.

## Sheet: 9. DEG_S_P1_P2
Supplemental Table 9. Top 40 differential genes by comparing S1+ P1 and P2 BSM (S1+ P2 BSM vs. S1+ P1 BSM)
No.	gene	logFC	AveExpr	t	P.Value	adj.P.Val	B
1	CXCR3	1.37045	5.93726	11.3059	1.45607027292458e-14	1.50412059193109e-10	22.8965
2	LTB	0.293679	10.8069	9.57747	2.6620244128042e-12	1.37493560921337e-08	17.3247
3	TCF7	1.45144	3.6131	8.01936	3.9653737302963e-10	1.36541035446536e-06	12.704
4	STMN1	-1.88997	4.51568	-7.6319	1.42888182530691e-09	2.95206985108408e-06	11.5276
5	RAPGEF5	-3.22384	2.16449	-7.83951	7.17825645970384e-10	1.85378473071852e-06	11.3388
6	IFNG-AS1	0.69153	6.12836	7.35226	3.62992925141134e-09	5.35673845243988e-06	10.85
7	TCL1A	-2.9542	2.30666	-7.4289	2.8099799719195e-09	4.83784885165474e-06	10.3004
8	MEF2B	-2.9435	2.36331	-7.21924	5.66607821541347e-09	7.31632349565265e-06	9.7018
9	RGS13	-2.55338	3.4057	-7.04176	1.0279537167774e-08	1.06187618943105e-05	9.51281
10	AC023590.1	-2.96059	2.58071	-7.06646	9.46057973427867e-09	1.06187618943105e-05	9.26702
11	IGHV3-23	-0.969103	4.65762	-6.79666	2.34549365504692e-08	2.01907912138622e-05	8.9651
12	ACY3	-1.91614	2.77502	-6.85672	1.9157709312898e-08	1.79908306547488e-05	8.65905
13	ZNF608	-1.02056	4.47244	-6.45216	7.50126040197068e-08	5.81520640313437e-05	7.99173
14	IFITM1	0.397969	8.52191	6.43753	7.88120906523536e-08	5.81520640313437e-05	7.41315
15	BCL7A	-1.31759	3.97372	-6.20509	1.72812916681042e-07	0.000111572	7.0666
16	PDGFD	-1.28678	3.97061	-6.12075	2.29757117781713e-07	0.000139611	6.72228
17	TASOR2	-0.568295	4.89349	-5.99008	3.57114776291862e-07	0.000194158	6.37874
18	BMP2K	-0.394257	7.35959	-6.04098	3.00754494538024e-07	0.0001726	6.3488
19	AUTS2	-0.68935	6.08089	-5.9586	3.97105866089342e-07	0.000205105	6.26018
20	RPL23A	0.191796	11.4137	6.24587	1.50577485242978e-07	0.000103698	6.23457
21	AL592429.2	-0.823746	3.47346	-5.87684	5.23126273009731e-07	0.000257328	6.13751
22	LHFPL2	-1.47455	4.20527	-5.60867	1.2891279212279e-06	0.000554862	5.27051
23	HIST1H1B	-1.56199	3.12918	-5.64857	1.127523813944e-06	0.000506405	5.22683
24	ABCA6	-1.30584	2.22912	-5.49658	1.87699271761079e-06	0.000745744	4.76265
25	FOS	0.321468	9.17751	5.66256	1.07577930554246e-06	0.000505127	4.68681
26	MARCKSL1	-0.432791	8.3228	-5.55771	1.52940517193796e-06	0.00063195	4.51777
27	LRMP	-0.54785	7.76023	-5.47095	2.04507099715404e-06	0.000782429	4.46618
28	IL21R	-1.48522	2.86672	-5.40365	2.56097449839783e-06	0.000944817	4.23986
29	HS2ST1	-0.968572	4.93024	-5.26674	4.04214053533807e-06	0.00125907	4.2207
30	BACH2	-0.817182	6.51113	-5.35173	3.04559525717281e-06	0.0010487	4.20232
31	CPM	-1.58706	2.61232	-5.3541	3.02157914562331e-06	0.0010487	4.10077
32	NIBAN1	-0.636465	4.41231	-5.25054	4.26595381789306e-06	0.00125907	4.09492
33	CENPE	-1.4564	1.29647	-5.29392	3.6926276471428e-06	0.00123048	3.97387
34	KIF11	-1.57369	1.96926	-5.26357	4.08507435053534e-06	0.00125907	3.8539
35	SSBP2	-0.864522	5.74623	-5.09884	7.055551822298e-06	0.00169497	3.63241
36	CCDC144A	-2.05537	1.82032	-5.16172	5.72922209721227e-06	0.00147957	3.62822
37	TK1	-1.50433	2.23494	-5.1644	5.67859863266514e-06	0.00147957	3.56862
38	CAMK1	-1.97434	1.65945	-5.19644	5.10597162689518e-06	0.0014393	3.45053
39	SYT17	-1.13895	3.2256	-5.05177	8.24307572500033e-06	0.00181172	3.37032
40	HMGB2	-0.777465	5.8109	-5.021	9.12389684159116e-06	0.001885	3.34763
Note:
logFC	Log₂ fold change — the log₂ difference in expression between two groups (e.g., treated vs. control).
AveExpr	Average expression across all samples (on the log₂ scale).
t	Moderated t-statistic for the gene’s differential expression (adjusted for empirical Bayes).
P.Value	Raw p-value from the statistical test for differential expression.
adj.P.Val	Adjusted p-value (usually FDR-corrected using Benjamini-Hochberg method).
B	B-statistic (log-odds) — log-odds that the gene is differentially expressed (higher = more likely).

## Sheet: 10. DAR_P1_P2
Supplemental Table 10. Top 20 differential peaks by comparing P1 and P2 BSM (P2 BSM vs. P1 BSM)
peaks	seqnames	start	end	log2FoldChange	padj	feature	feat_start	feat_end	feat_strand	feat_anchor	distance	relative_location	gene_id	gene_name	motif_id	motif_alt_id	regulate
1	chr15	68631459	68631959	-1.5197	0.0026181	gene	68578968	68727806	+	start	52741	PeakInsideFeature	ENSG00000103647.12	CORO2B	NA	NA	Down in P2
2	chr18	69935338	69935838	1.90559	0.00351323	gene	69831157	69961803	-	start	26215	PeakInsideFeature	ENSG00000150637.8	CD226	MA0690.1	TBX21	Up in P2
3	chr11	77999366	77999866	-1.59675	0.00360714	gene	77878719	77994678	-	start	4938	Upstream	ENSG00000149262.16	INTS4	NA	NA	Down in P2
4	chr19	1132062	1132562	-1.29133	0.00481467	gene	1103925	1106791	+	start	28387	Downstream	ENSG00000167468.16	GPX4	NA	NA	Down in P2
5	chr19	2324890	2325390	-1.36403	0.00492601	gene	2328614	2354806	+	start	3474	Upstream	ENSG00000005206.16	SPPL2B	NA	NA	Down in P2
6	chr21	43352622	43353122	1.44527	0.0064502	gene	43414482	43427189	-	start	74317	Downstream	ENSG00000142178.8	SIK1	NA	NA	Up in P2
7	chr19	58009526	58010026	-1.53426	0.0064502	gene	57977052	58003349	-	start	6427	Upstream	ENSG00000166704.11	ZNF606	NA	NA	Down in P2
8	chr5	134122500	134123000	1.59083	0.00728491	gene	134114710	134151865	+	start	8040	PeakInsideFeature	ENSG00000081059.19	TCF7	MA0690.1	TBX21	Up in P2
9	chr2	71236045	71236545	-1.59172	0.00728491	gene	71182738	71227083	-	start	9212	Upstream	ENSG00000124374.8	PAIP2B	NA	NA	Down in P2
10	chr14	95695852	95696352	-1.2949	0.0138157	gene	95686416	95692643	+	start	9686	Downstream	ENSG00000213231.12	TCL1B	NA	NA	Down in P2
11	chr16	27232150	27232650	-1.18229	0.0148158	gene	27203494	27221768	+	start	28906	Downstream	ENSG00000155666.11	KDM8	NA	NA	Down in P2
12	chr19	57487457	57487957	-1.29283	0.0161371	gene	57487710	57496097	+	start	3	OverlapStart	ENSG00000105136.20	ZNF419	NA	NA	Down in P2
13	chr11	67345190	67345690	-1.70042	0.0161371	gene	67350776	67356972	-	start	11532	Downstream	ENSG00000175482.8	POLD4	NA	NA	Down in P2
14	chr17	77445345	77445845	-1.16151	0.0161371	NA	NA	NA	NA	NA	NA	NA	NA	NA	NA	NA	Down in P2
15	chr1	16732357	16732857	-1.4099	0.0161371	gene	16740272	16972979	+	start	7665	Upstream	ENSG00000058453.16	CROCC	NA	NA	Down in P2
16	chr17	3916348	3916848	-1.35646	0.0161371	gene	3896591	3916500	-	start	98	OverlapStart	ENSG00000108405.3	P2RX1	NA	NA	Down in P2
17	chr1	16895992	16896492	-1.10618	0.0161371	gene	16974501	16980835	-	start	84593	Downstream	ENSG00000117122.13	MFAP2	NA	NA	Down in P2
18	chr11	65112410	65112910	-1.27204	0.0161371	gene	65111844	65116384	+	start	816	PeakInsideFeature	ENSG00000149809.14	TM7SF2	NA	NA	Down in P2
19	chr19	3604811	3605311	-1.52935	0.0161371	gene	3594505	3606840	-	start	1779	PeakInsideFeature	ENSG00000006638.11	TBXA2R	NA	NA	Down in P2
20	chr11	64743738	64744238	-1.16779	0.0171031	gene	64726910	64745456	-	start	1468	PeakInsideFeature	ENSG00000068831.18	RASGRP2	NA	NA	Down in P2
