# Supplementary material for: SARS-CoV-2 infection and vaccination elicit distinct pharyngeal mucosal B cell responses in children
Source: Research Square preprint supplement (doi:10.21203/rs.3.rs-7428491/v1), 2025-09-09
Supplement: Supplementary file 3 [file eee3156177f773e65def0406.xlsx]

## Sheet: 1. 29c_B_panel
Number	Reagent	Source	Catalog number	Clone
1	Omicron-RBD-Biotin	Acro	SPD-C82E4
2	Anti-CD11c-BUV395	BD	563787	B-ly6
3	Anti-CD71-BUV661	BD	749818	L01.1
4	Anti-CD45-BUV805	BD	612891	HI30
5	Anti-CD62L-BV750	BD	747422	DREG-56
6	Anti-FCRL5/FCRL3-AF647	BD	564343	307307
7	Anti-CD86-AF700	BD	561124	2331 (FUN-1)
8	Anti-CD20-APC-H7	BD	560734	2H7
9	SAv-BUV615	BD	613013
10	Anti-CXCR3-PE-Cy5	BD	551128	1C6/CXCR3
11	Anti-CD10-BV510	BD	563032	HI10a
12	Anti-CD19-BV650	BD	563226	SJ25C1
13	Anti-CD95-BB700	BD	566542	DX2
14	Anti-IgG-PE-Cy7	BD	561298	G18-145
15	Anti-CD3-BV570	BioLegend	300436	UCHT1
16	Anti-IgD-BV605	BioLegend	348232	IA6-2
17	Anti-IgM-BV711	BioLegend	314540	MHM-88
18	Anti-CD27-BV785	BioLegend	302832	O323
19	Anti-CD14-Spark Blue 550	BioLegend	367148	63D3
20	Anti-CD21-FITC	BioLegend	354910	Bu32
21	Live dead dye-Zombie NIR	BioLegend	423106
22	CoV2-RBD-Biotin	BioLegend	793906
23	SAv-BV421	BioLegend	405225
24	CoV2-S1-Biotin	BioLegend	793806
25	Anti-CD38-APC-Fire810	BioLgend	303550	HIT2
26	Anti-IgA-VioBlue	Miltenyi	130-113-479	IS11-8E10
27	SAv-APC	ThermoFisher	S32362
28	Anti-CD85j-Super bright 436	ThermoFisher	62-5129-42	HP-F1
29	Anti-FCRL4-PerCP-eFluor710	ThermoFisher	46-3079-42	413D12
30	SAv-PE	ThermoFisher	S21388

## Sheet: 2. 37c_panel
Number	Reagent	Source	Catalog Number	Clone
1	Anti-CD141-BB515	BD	566017	1A4
2	Anti-CD16-BUV496	BD	612944	3G8
3	Anti-TCR γδ-BB700	BD	745944	11F2
4	Anti-CD11c-BUV661	BD	612967	B-ly6
5	Anti-IgG-BV605	BD	563246	G18-145
6	Anti-CD127-APC-R700	BD	565185	HIL-7R-M21
7	Anti-IgD-BV480	BD	566138	IA6-2
8	Anti-CD56-BUV737	BD	612766	NCAM16.2
9	Anti-CXCR5-BV750	BD	747111	RF8B2
10	Anti-CD8-BUV805	BD	612889	SK1
11	Anti-CD45RA-BUV395	BD	740315	5H9
12	SAv-BUV615	BD	613013
13	Anti-CD14-Spark Blue 550	BioLegend	367148	63D3
14	Anti-CD25-PE	BioLegend	302606	BC96
15	Anti-CD28-BV650	BioLegend	302946	CD28.2
16	Anti-CXCR3-PE-Cy7	BioLegend	353720	G025H7
17	Anti-PD-1-BV785	BioLegend	329930	EH12.2H7
18	Anti-CCR6-BV711	BioLegend	353436	G034E3
19	Anti-CCR7-BV421	BioLegend	353208	G043H7
20	Anti-CD19-Spark NIR 685	BioLegend	302270	HIB19
21	Anti-CD38-APC/Fire 810	BioLegend	303550	HIT2
22	Anti-CD57-FITC	BioLegend	359604	HNK-1
23	Anti-CD1c-Alexa Fluor 647	BioLegend	331510	L161
24	Anti-HLA-DR-APC-Fire 750	BioLegend	307658	L243
25	Anti-IgM-BV570	BioLegend	314517	MHM-88
26	Anti-CD3-BV510	BioLegend	317332	OKT3
27	Anti-CD21-PerCP CY5.5	BioLegend	354908	Bu32
28	Anti-CD4-YG584	Cytek	R7-20041	SK3
29	Anti-IgA-Biotin	Jackson ImmunoResearch	109-066-011	Polyclonal
30	Anti-CD123-Super Bright 436	ThermoFisher	62-1239-42	6H6
31	Anti-CD95-PE-Cy5	ThermoFisher	15-0959-42	DX2
32	Anti-CD45-PerCP	ThermoFisher	MHCD4531	HI30
33	Anti-CD20-Pacific Orange	ThermoFisher	MHCD2030	HI47
34	Anti-CD161-eFluor 450	ThermoFisher	48-1619-42	HP-3G10
35	Anti-CD27-APC	ThermoFisher	17-0279-42	O323
36	Live dead dye-Blue	ThermoFisher	L23105
37	Anti-CD103-PE/Dazzle 594	BioLegend	350224	Ber-ACT8
38	Anti-CD69-BUV563	BD	748764	FN50

## Sheet: 3.TF_panel
Number	Reagent	Source	Catalog number	Clone
1	Anti-CD11c-BUV395	BD	563787	B-ly6
2	Anti-CD69-BUV563	BD	748764	FN50
3	Anti-CD71-BUV661	BD	749818	L01.1
4	Anti-CD10-BUV737	BD	612826	HI10a
5	Anti-BCL6-PE	BD	561522	K112-91
6	Anti-CXCR5-BV750	BD	747111	RF8B2
7	Anti-FCRL5/FCRL3-AF647	BD	564343	CD307e/c
8	Anti-Ki67-AF700	BD	561277	B56
9	Anti-CD20-APC-H7	BD	560734	2H7
10	Anti-IgG-BV510	BD	563247	G18-145
11	Anti-CD19-BV650	BD	563226	SJ25C1
12	Anti-CD95-BB700	BD	566542	DX2
13	Anti-CD183(CXCR3)-PE-Cy5	BD	551128	1C6/CXCR3
14	Anti-CD3-BV570	BioLegend	300436	UCHT1
15	Anti-IgD-BV605	BioLegend	348232	IA6-2
16	Anti-IgM-BV711	BioLegend	314540	MHM-88
17	Anti-CD27-BV785	BioLegend	302832	O323
18	Anti-CD14-Spark Blue 550	BioLegend	367148	63D3
19	Anti-CD21-FITC	BioLegend	354910	Bu32
20	Live dead dye- Blue	BioLegend	L23105
21	CoV2-RBD-Biotin	BioLegend	793906
22	SAv-BV421	BioLegend	405225
23	CoV2-S1-Biotin	BioLegend	793806
24	Anti-CD38-APC-Fire810	BioLgend	303550	HIT2
25	Anti-IgA-VioBlue	Miltenyi	130-113-479	IS11-8E10
26	SAv-APC	ThermoFisher	S32362
27	Anti-CD85j-Super bright 436	ThermoFisher	62-5129-42	HP-F1
28	Anti-FCRL4-PerCP-eFluor710	ThermoFisher	46-3079-42	413D12
29	Anti-Tbet-PE-Cy7	Biolegend	644824	4B10
30	Anti-CD45-PerCP	ThermoFisher	MHCD4531	HI30
	S1 and RBD probes were not stained for PBMCs.

## Sheet: 4. CITE-seq_sorting
Number	Reagent	Source	Catalog number	Clone
1	Anti-CD19-PeCy7	BioLegend	302216	HIB19
2	Anti-CD56-BV510	BioLegend	362533	5.1H11
3	Anti-CD14-BV510	BioLegend	367124	63D3
4	Anti-CD3-Alexa Fluor 488	BioLegend	317310	OKT3
5	Anti-CD8-PE	BioLegend	303804	QA18A37
6	Anti-CD95-PE/Dazzle 594	BioLegend	305634	DX2
7	CoV2-S1-Biotin	BioLegend	793806
8	SAv-BV421	BioLegend	405225
9	Anti-CD45-PerCP-Vio 700	Miltenyi	130-110-636	REA747
10	Anti-CD4-APC-eFLuor 780	ThermoFisher	47-0048-42	OKT4
11	Live dead dye-Aqua	ThermoFisher	L34957
12	SAv-APC	ThermoFisher	S32362
	Anti-S1-BV421 was conjugated from Biotin-S1 and SAv-BV421
	Anti-S1-APC was conjugated from Biotin-S1 and SAv-APC

## Sheet: 5. CITE-seq_totalseq_abs
Number	Reagent	Source	Catalog number	Barcode	Clone
1	TotalSeq™-C0384 anti-human IgD Antibody	BioLegend	348245	CAGTCTCCGTAGAGT	IA6-2
2	TotalSeq™-C0389 anti-human CD38 Antibody	BioLegend	303543	TGTACCCGCTTGTGA	HIT2
3	TotalSeq™-C0154 anti-human CD27 Antibody	BioLegend	302853	GCACTCCTGCATGTA	O323
4	TotalSeq™-C0181 anti-human CD21 Antibody	BioLegend	354923	AACCTAGTAGTTCGG	Bu32
5	TotalSeq™-C0053 anti-human CD11c Antibody	BioLegend	371521	TACGCCTATAACTTG	S-HCL-3
6	TotalSeq™-C0828 anti-human CD307d (FcRL4) Antibody	BioLegend	340213	CGATTTGATCTGCCT	413D12
7	TotalSeq™-C0829 anti-human CD307e (FcRL5) Antibody	BioLegend	340309	TCACGCAGTCCTCAA	509f6
8	TotalSeq™-C0826 anti-human CD307c/FcRL3 Antibody	BioLegend	374413	GCCTAGTTTGAACGC	H5/FcRL3
9	TotalSeq™-C0006 anti-human CD86 Antibody	BioLegend	305447	GTCTTTGTCAGTGCA	IT2.2
10	TotalSeq™-C0147 anti-human CD62L Antibody	BioLegend	304851	GTCCCTGCAACTTGA	DREG-56
11	TotalSeq™-C0146 anti-human CD69 Antibody	BioLegend	310951	GTCTCTTGGCTTAAA	FN50
12	TotalSeq™-C0159 anti-human HLA-DR Antibody	BioLegend	307663	AATAGCGAGCAAGTA	L243
13	TotalSeq™-C0161 anti-human CD11b Antibody*	BioLegend	301359	GACAAGTGATCTGCA	ICRF44
14	TotalSeq™-C0359 anti-human CD83 Antibody	BioLegend	305341	CCACTCATTTCCGGT	HB15e
15	TotalSeq™-C0088 anti-human CD279 (PD-1) Antibody	BioLegend	329963	ACAGCGCCGTATTTA	EH12.2H7
16	TotalSeq™-C0168 anti-human CD57 Recombinant Antibody	BioLegend	393321	AACTCCCTATGGAGG	QA17A04
17	TotalSeq™-C0145 anti-human CD103 (Integrin αE) Antibody	BioLegend	350233	GACCTCATTGTGAAT	Ber-ACT8
18	TotalSeq™-C0180 anti-human CD24 Antibody	BioLegend	311143	AGATTCCTTCGTGTT	ML5
19	TotalSeq™-C0140 anti-human CD183 (CXCR3) Antibody	BioLegend	353747	GCGATGGTAGATTAT	G025H7
21	TotalSeq™-C0143 anti-human CD196 (CCR6) Antibody	BioLegend	353440	GATCCCTTTGTCACT	G034E3
22	TotalSeq™-C0144 anti-human CD185 (CXCR5) Antibody	BioLegend	356939	AATTCAACCGTCGCC	J252D4
23	TotalSeq™-C0091 Mouse IgG2a, κ isotype Ctrl Antibody	Biolegend	400293	CTCCTACCTAAACTG	MOPC-173
24	TotalSeq™-C1168 anti-mouse IgG2b Antibody	Biolegend	406720	GCATTGTAGTCACGC	RMG2b-1
25	TotalSeq™-C0090 Mouse IgG1, κ isotype Ctrl Antibody	Biolegend	400187	GCCGGACGACATTAA	MOPC-21
	*CD11b was not included in B_306_4

## Sheet: 6. P1-P4_BSM_sorting
Number	Reagent	Source	Catalog number	Clone
1	Anti-CXCR3-PeCy5	BD	551128	1C6
2	Anti-CD19-APCef780	ThermoFisher	47-0199-42	HIB19
3	Live Dead Aqua	ThermoFisher	L34957
4	Anti-CD21-FITC	BioLegend	354910	Bu32
5	Anti-CD3-APC	BD	561804	HIT3a
6	Anti-CD38-BV421	BD	562444	HIT2
7	Anti-IgD-BV605	BioLegend	348232	IA6-2

## Sheet: 7. ATAC-seq_primer_list
List	Sequence
Ad1_noMX:	AATGATACGGCGACCACCGAGATCTACACTCGTCGGCAGCGTCAGATGTG
Ad2.1_TAAGGCGA	CAAGCAGAAGACGGCATACGAGATTCGCCTTAGTCTCGTGGGCTCGGAGATGT
Ad2.2_CGTACTAG	CAAGCAGAAGACGGCATACGAGATCTAGTACGGTCTCGTGGGCTCGGAGATGT
Ad2.3_AGGCAGAA	CAAGCAGAAGACGGCATACGAGATTTCTGCCTGTCTCGTGGGCTCGGAGATGT
Ad2.4_TCCTGAGC	CAAGCAGAAGACGGCATACGAGATGCTCAGGAGTCTCGTGGGCTCGGAGATGT
Ad2.5_GGACTCCT	CAAGCAGAAGACGGCATACGAGATAGGAGTCCGTCTCGTGGGCTCGGAGATGT
Ad2.6_TAGGCATG	CAAGCAGAAGACGGCATACGAGATCATGCCTAGTCTCGTGGGCTCGGAGATGT
Ad2.7_CTCTCTAC	CAAGCAGAAGACGGCATACGAGATGTAGAGAGGTCTCGTGGGCTCGGAGATGT
Ad2.8_CAGAGAGG	CAAGCAGAAGACGGCATACGAGATCCTCTCTGGTCTCGTGGGCTCGGAGATGT
Ad2.9_GCTACGCT	CAAGCAGAAGACGGCATACGAGATAGCGTAGCGTCTCGTGGGCTCGGAGATGT
Ad2.10_CGAGGCTG	CAAGCAGAAGACGGCATACGAGATCAGCCTCGGTCTCGTGGGCTCGGAGATGT
Ad2.11_AAGAGGCA	CAAGCAGAAGACGGCATACGAGATTGCCTCTTGTCTCGTGGGCTCGGAGATGT
Ad2.12_GTAGAGGA	CAAGCAGAAGACGGCATACGAGATTCCTCTACGTCTCGTGGGCTCGGAGATGT
Ad2.13_GTCGTGAT	CAAGCAGAAGACGGCATACGAGATATCACGACGTCTCGTGGGCTCGGAGATGT
Ad2.14_ACCACTGT	CAAGCAGAAGACGGCATACGAGATACAGTGGTGTCTCGTGGGCTCGGAGATGT
Ad2.15_TGGATCTG	CAAGCAGAAGACGGCATACGAGATCAGATCCAGTCTCGTGGGCTCGGAGATGT
Ad2.16_CCGTTTGT	CAAGCAGAAGACGGCATACGAGATACAAACGGGTCTCGTGGGCTCGGAGATGT
Ad2.17_TGCTGGGT	CAAGCAGAAGACGGCATACGAGATACCCAGCAGTCTCGTGGGCTCGGAGATGT
Ad2.18_GAGGGGTT	CAAGCAGAAGACGGCATACGAGATAACCCCTCGTCTCGTGGGCTCGGAGATGT
Ad2.19_AGGTTGGG	CAAGCAGAAGACGGCATACGAGATCCCAACCTGTCTCGTGGGCTCGGAGATGT
Ad2.20_GTGTGGTG	CAAGCAGAAGACGGCATACGAGATCACCACACGTCTCGTGGGCTCGGAGATGT
Ad2.21_TGGGTTTC	CAAGCAGAAGACGGCATACGAGATGAAACCCAGTCTCGTGGGCTCGGAGATGT
Ad2.22_TGGTCACA	CAAGCAGAAGACGGCATACGAGATTGTGACCAGTCTCGTGGGCTCGGAGATGT
Ad2.23_TTGACCCT	CAAGCAGAAGACGGCATACGAGATAGGGTCAAGTCTCGTGGGCTCGGAGATGT
Ad2.24_CCACTCCT	CAAGCAGAAGACGGCATACGAGATAGGAGTGGGTCTCGTGGGCTCGGAGATGT

## Sheet: 8. BCR_stimu_panel
Number	Reagent	Source	Catalog number	Clone
1	Anti-CD183(CXCR3)-PE-Cy5	BD	551128	1C6/CXCR3
2	Anti-CXCR5-BV750	BD	747111	RF8B2
3	Live dead dye- Blue	BioLegend	L23105
4	Anti-CD11c-BUV395	BD	563787	B-ly6
5	Anti-CD69-BUV563	BD	748764	FN50
6	Anti-CD71-BUV661	BD	749818	L01.1
7	Anti-CD21-FITC	BioLegend	354910	Bu32
8	SAv-BV421	BioLegend	405225
9	Anti-CD3-BV570	BioLegend	300436	UCHT1
10	Anti-IgD-BV605	BioLegend	348232	IA6-2
11	Anti-CD19-BV650	BD	563226	SJ25C1
12	Anti-CD27-BV785	BioLegend	302832	O323
13	Anti-CD14-Spark Blue 550	BioLegend	367148	63D3
14	Anti-CD45-PerCP	ThermoFisher	MHCD4531	HI30
15	Anti-CD95-BB700	BD	566542	DX2
16	Anti-FCRL4-PerCP-eFluor710	ThermoFisher	46-3079-42	413D12
17	Anti-CD85j-Super bright 436	ThermoFisher	62-5129-42	HP-F1
18	Anti-FCRL5/FCRL3-AF647	BD	564343	CD307e/c
19	CoV2-S1-Biotin	BioLegend	793806
20	Anti-CD20-APC-H7	BD	560734	2H7
21	Anti-CD38-APC-Fire810	BioLgend	303550	HIT2
22	phosphorylated PLCγ2 (p-Y759)-AF488	BD	558507
23	phosphorylated Syk (p-Y348)-PE	InvivoGen	558529
24	CoV2-RBD-Biotin	BioLegend	793906
25	CoV2-S1-Biotin	BioLegend	793806
26	goat F(ab’)2 anti-human IgA/G/M	Jackson ImmunoResearch Laboratories	109-006-064
27	Phosflow Perm/wash buffers I	BD	557885
28	BD cytofix buffer	BD	554655

## Sheet: 9. PC_differ_panel
Number	Reagent	Source	Catalog number	Clone
1	Anti-CD21-BUV805	BUV805	742008	B-ly4
2	Anti-CD3-BV570	BioLegend	300436	UCHT1
3	Anti-IgD-BV605	BioLegend	348232	IA6-2
4	Anti-CD19-BV650	BD	563226	SJ25C1
5	Anti-CD27-BV785	BioLegend	302832	O323
6	Anti-CD20-APC-H7	BD	560734	2H7
7	Anti-CD38-APC-Fire810	BioLgend	303550	HIT2
8	Anti-CD183(CXCR3)-PE-Cy5	BD	551128	1C6/CXCR3
9	Anti-IgG-PE-Cy7	BD	561298	G18-145
10	Anti-IgM-BV711	BioLegend	314540	MHM-88
11	Anti-IgA-VioBlue	Miltenyi	130-113-479	IS11-8E10
12	R848 (Resiquimod)	InvivoGen	tlrl-r848-5
13	CellTrace™ CFSE Cell Proliferation Kit	ThermoFisher	C34554
14	Recombinant human IL-2	StemCell Technologies	78036.2	1000U/ml
15	Live dead dye-Blue	ThermoFisher	L23105
16	Dynabeads™ CD19 Pan B	Thermo Scientific	11143D
17	FACS™ Lysing Solution 10X Concentrate	BD	349202
18	FACS™ Permeabilizing Solution 2	BD	347692

## Sheet: 10. Image_panel
Number	Reagent	Source	Catalog number	Clone
1	Anti-BCL-6	Biocare Medical	CM410-C	LN22
2	Anti-CD11c	Novus	NBP3-14718	BLR138H
3	Anti-CD138	R&D	AF2780	Polyclonal Goat IgG
4	Anti-CD4-Alexa 700	R&D	FAB8165N	Polyclonal Goat IgG
5	Anti-CD20-eFluor 615	eBioscience	42-0202-82	L26
6	Anti-CXCR3-PE	BD Bioscience	550633	1C6
7	Anti-IgD-Alexa 488a	AbCam	ab124795	EPR6146
8	Goat anti-mouse IgG, Alex 647	SouthernBiotech	1030-31	NA
9	Donkey anti-goat IgG (H+L), Alex 750	AbCam	ab175745	NA
10	Donkey anti-rabbit IgG (H+L), Alex plus 405	ThermoFisher	A48258	NA
11	TOPRO	ThermoFisher	T3602	NA
